# Promyelocytic Leukemia (PML) Nuclear Bodies (NBs) Induce Latent/Quiescent HSV-1 Genomes Chromatinization Through a PML-NB/Histone H3.3/H3.3 Chaperone Axis

Camille Cohen<sup>1</sup>, Armelle Corpet<sup>1</sup>, Mohamed Ali Maroui<sup>1</sup>, Olivier Binda<sup>1</sup>, Nolwenn Pocard<sup>2</sup>, Antoine Rousseau<sup>2,3,5</sup>, Pascale Texier<sup>1</sup>, Nancy Sawtell<sup>4</sup>, Marc Labetoulle<sup>2,3,5</sup> and Patrick Lomonte<sup>1,\*</sup>

1. Univ Lyon, Université Claude Bernard Lyon 1, CNRS UMR 5310, INSERM U 1217, LabEx DEVweCAN, Institut NeuroMyoGène (INMG), team Chromatin Assembly, Nuclear Domains, Virus. F-69100, Lyon, France

2. Institut de Biologie Intégrative de la Cellule (I2BC), Département de Virologie, F-91190 Gif-sur-Yvette, France.

3. Université Paris Sud, Centre Hospitalier Universitaire de Bicêtre, Service d'Ophthalmologie. F-94043, Le Kremlin-Bicêtre, France

4. Division of Infectious Diseases, Cincinnati Children's Hospital Medical Center, Cincinnati, Ohio, USA.

5. Current address: Université Paris Sud, UMR 1184, Commissariat à l'énergie atomique et aux énergies alternatives (CEA), Infectious diseases models for innovative therapies (IDMIT), Immunologie des Infections Virales et des Maladies Auto-immunes (IMVA), F-92265 Fontenay-aux-Roses Cedex, France

\* Corresponding author: [patrick.lomonte@univ-lyon1.fr](mailto:patrick.lomonte@univ-lyon1.fr)

**Short title: PML-NB & latent HSV-1 chromatinization**

**Key words:** Herpes simplex virus 1, Latency, Chromatin, histone variant H3.3, Promyelocytic leukemia nuclear bodies (PML-NBs or ND10), DAXX-ATRX, HIRA complex

*The manuscript was edited for English language usage, grammar, spelling and punctuation by one or more native English-speaking editors at Nature Research Editing Service.*

*Certificate number: 8FD8-9D08-A8A9-C3CA-B651*

41 Herpes simplex virus 1 (HSV-1) latency establishment is tightly controlled by promyelocytic  
42 leukemia (PML) nuclear bodies (NBs) (or ND10), although their exact implication is still elusive. A  
43 hallmark of HSV-1 latency is the interaction between latent viral genomes and PML-NBs, leading to  
44 the formation of viral DNA-containing PML-NBs (vDCP-NBs). Using a replication-defective HSV-1-  
45 infected human primary fibroblast model reproducing the formation of vDCP-NBs, combined with  
46 an immuno-FISH approach developed to detect latent/quiescent HSV-1, we show that vDCP-NBs  
47 contain both histone H3.3 and its chaperone complexes, i.e., DAXX/ATRAX and HIRA complex (HIRA,  
48 UBN1, CABIN1, and ASF1a). HIRA also co-localizes with vDCP-NBs present in trigeminal ganglia  
49 (TG) neurons from HSV-1-infected wild type mice. ChIP-qPCR performed on fibroblasts stably  
50 expressing tagged H3.3 (e-H3.3) or H3.1 (e-H3.1) show that latent/quiescent viral genomes are  
51 chromatinized almost exclusively with e-H3.3, consistent with an interaction of the H3.3  
52 chaperones with multiple viral loci. Depletion by shRNA of single proteins from the H3.3 chaperone  
53 complexes only mildly affects H3.3 deposition on the latent viral genome, suggesting a  
54 compensation mechanism. In contrast, depletion (by shRNA) or absence of PML (in mouse  
55 embryonic fibroblast (MEF) *pml*<sup>-/-</sup> cells) significantly impacts the chromatinization of the  
56 latent/quiescent viral genomes with H3.3 without any overall replacement with H3.1.  
57 Consequently, the study demonstrates a specific epigenetic regulation of latent/quiescent HSV-1  
58 through an H3.3-dependent HSV-1 chromatinization involving the two H3.3 chaperones  
59 DAXX/ATRAX and HIRA complexes. Additionally, the study reveals that PML-NBs are major actors in  
60 latent/quiescent HSV-1 H3.3 chromatinization through a PML-NB/histone H3.3/H3.3 chaperone  
61 axis.

62

63

64 Author summary

65 An understanding of the molecular mechanisms contributing to the persistence of a virus in its host  
66 is essential to be able to control viral reactivation and its associated diseases. Herpes simplex virus  
67 1 (HSV-1) is a human pathogen that remains latent in the PNS and CNS of the infected host.

68 However, the latency is unstable, and frequent reactivations of the virus are responsible for PNS  
69 and CNS pathologies. It is thus crucial to understand the physiological, immunological and  
70 molecular levels of interplay between latent HSV-1 and the host. Promyelocytic leukemia (PML)  
71 nuclear bodies (NBs) play a major role in controlling viral infections by preventing the onset of lytic  
72 infection. In previous studies, we showed a major role of PML-NBs in favoring the establishment of  
73 a latent state for HSV-1. A hallmark of HSV-1 latency establishment is the formation of PML-NBs  
74 containing the viral genome, which we called “viral DNA-containing PML-NBs” (vDCP-NBs). The  
75 genome entrapped in the vDCP-NBs is transcriptionally silenced. This naturally occurring  
76 latent/quiescent state could, however, be transcriptionally reactivated. Therefore, understanding  
77 the role of PML-NBs in controlling the establishment of HSV-1 latency and its reactivation is  
78 essential to design new therapeutic approaches based on the prevention of viral reactivation.

79

80

81

82 Herpes simplex virus 1 (HSV-1) is a human pathogen with neurotropic tropism and the  
83 causal agent of cold sores and more severe CNS pathologies such as encephalitis [1]. After the initial  
84 infection, HSV-1 remains latent in neuronal ganglia with the main site of latency being the  
85 trigeminal (or Gasserian) ganglion (TG). Two transcriptional programs are associated with HSV-1  
86 infection, the lytic cycle and latency, which differ by the number and degree of viral gene  
87 transcription. The lytic cycle results from the sequential transcription of all viral genes  
88 (approximately 80) and leads to the production of viral progeny. The latency phase, occurring  
89 exclusively in neurons, is limited to the abundant expression of the so-called Latency Associated  
90 Transcripts (LATs), although physiologically a transitory expression of a limited number of lytic  
91 genes is not excluded, making latency a dynamic process [2-4].

92 Following lytic infection of epithelial cells at the periphery, the viral particle enters the axon  
93 termini of the innervating neurons by fusion of its envelope with the plasma membrane. The  
94 nucleocapsid is then carried into the neuron body by retrograde transport, most likely through the

95 interaction of viral capsid components [5] with microtubule-associated proteins such as dynein and  
96 dynactin [6-10]. Once the nucleocapsid reaches the cell body, the virus phenotype changes from the  
97 one at the axon termini because most of the outer tegument proteins, including VP16, a viral  
98 transactivator that is essential for the onset of lytic infection, remain at the axonal tip [11-13].  
99 Hence, when the viral DNA is injected into the neuron nucleus, it does not automatically benefit  
00 from the presence of VP16 to initiate lytic gene transcription. Rather, the balance between lytic and  
01 latent transcriptional programs most likely depends on stochastic events and on undescribed  
02 neuron-associated factor(s) able to initiate the transcription of VP16 through the activation of  
03 neuro-specific sequences present in the VP16 promoter [14]. Without VP16 synthesis, transcription  
04 of the viral genes encoding ICP4, the major transactivator protein, and ICP0, a positive regulator of  
05 viral and cellular gene transcription, is hampered. Hence, ICP4 and ICP0 gene transcription is  
06 unlikely to reach the required level to produce these two proteins above a threshold that would  
07 favor onset of the lytic cycle. Therefore, in neurons, commitment of the infectious process towards  
08 the lytic cycle or latency depends on a race between opposing infection-prone viral components  
09 and cellular features with antiviral activities.

10 Promyelocytic leukemia (PML) nuclear bodies (NBs) (also called ND10) are proteinaceous  
11 entities aimed to control viral infection as part of the cell and nucleus-associated intrinsic antiviral  
12 response but also through innate immunity associated with the interferon (IFN) response. Our  
13 recent studies have shown that PML-NBs tightly associate with incoming HSV-1 genomes in the  
14 nucleus of infected TG neurons in mouse models and in primary TG neuron cultures [15,16]. Hence,  
15 PML-NBs reorganize in structures called viral DNA-containing PML-NBs (vDCP-NBs), which are  
16 formed at early times during the process of HSV-1 latency establishment and persist during latency  
17 *per se* in a large subset of latently infected neurons in a mouse model of infection [15]. HSV-1  
18 genomes trapped in the vDCP-NBs are transcriptionally repressed for LAT production [15]. It is  
19 known that HSV-1 latency, at least in the mouse model and possibly in humans, is heterogeneous at  
20 the single neuron level for the expression of LAT [15,17-24]. Therefore, although at the entire TG  
21 level HSV-1 latency could be a dynamic process from a transcriptional perspective, at the single



22 neuron level, a strict, transcriptionally silent, quiescence can be observed, and vDCP-NB-containing  
23 neurons are major contributors of this latent/quiescent HSV-1 state. In humans, vDCP-NB-like  
24 structures have also been observed in latently infected TG neurons [16], suggesting that vDCP-NBs  
25 are probably molecular hallmarks of the HSV-1 latency process, including in the natural host.

26 Another essential feature of HSV-1 latency is the potent chromatinization of its 150-kb  
27 genome, which enters the nucleus of the infected cells as a naked/non-nucleosomal dsDNA [25-27].  
28 Once the viral genome is injected into the nucleus of the infected neuron, it circularizes, associates  
29 with nucleosomes to become chromatinized, and remains as an episome that is unintegrated into  
30 the host cell genome [28]. Although latent viral genomes sustain epigenetic regulation, essentially  
31 through post-translational modifications of associated histones {Kubat:2004ty, Wang:2005vo,  
32 Knipe:2008uo, [29,30], not much is known about the mechanisms that induce their  
33 chromatinization and which specific histone variants are associated with these latent genomes. In  
34 mammals, specific H3 histone variants that differ by a few amino acids can influence chromatin  
35 compaction and transcriptional activity of the genome. The histone variant H3.3, a specific variant  
36 of the histone H3 that is expressed throughout the cell cycle, is deposited in a replication-  
37 independent manner, in contrast to H3.1 [31] (and for review [32]). Interestingly, death domain  
38 associated protein 6 (DAXX) and  $\alpha$ -thalassemia mental retardation X-linked protein (ATRX),  
39 initially identified as a transcriptional repressor and a chromatin remodeler, respectively, are  
40 constitutively present in PML-NBs and have now been identified as H3.3-specific histone  
41 chaperones. The other histone H3.3 specific chaperone complex is called the HIRA complex, which  
42 is composed of Histone cell cycle regulator (HIRA), Ubinuclein 1 (UBN1), Calcineurin-binding  
43 protein 1 (CABIN1), and Anti-silencing function protein 1 homolog A (ASF1a) [31]. The HIRA  
44 complex does not normally accumulate in PML-NBs except upon entry of the cell into senescence  
45 [33,34]. The histone variant H3.3 itself localizes in PML-NBs in proliferating and senescent cells,  
46 linking PML-NBs with the chromatin assembly pathway independently of replication [35-37].  
47 Because vDCP-NBs contain DAXX and ATRX [15,16,38], their involvement in the chromatinization

48 of incoming HSV-1 genomes and/or long-term maintenance of chromatinized HSV-1 genomes is  
49 thus plausible.

50 Human primary fibroblasts or adult mouse primary TG neuron cultures infected through  
51 their cell body with a replication-defective HSV-1 virus, *in1374*, which is unable to synthesize  
52 functional ICP4 and ICP0 under specific temperature conditions, enable the establishment of a  
53 latent/quiescent state for HSV-1 [16,38-40]. The latent/quiescent state of HSV-1 in human primary  
54 fibroblasts has also been reproduced using engineered HSV-1 unable to express major immediate  
55 early genes [41,42]. We have shown that this latent/quiescent state is linked to the formation of  
56 vDCP-NBs, mimicking, at least concerning this particular structural aspect, the latency observed in a  
57 subset of neurons in mouse models and in humans [15,16]. Here, using the *in1374*-based *in cellula*  
58 model of infection, we showed that vDCP-NBs contained not only the DAXX and ATRX proteins but  
59 also all the components of the HIRA complex and H3.3 itself. HIRA was also detected co-localizing  
60 with vDCP-NBs in neurons of TG harvested from HSV-1 wild type infected mice. Both DAXX/ATRX  
61 and HIRA complex components were found interacting with multiple viral loci by chromatin  
62 immunoprecipitation (ChIP). Using the same approaches, we showed that latent/quiescent viral  
63 genomes were almost exclusively chromatinized with H3.3. Most interestingly, we found that H3.3  
64 chromatinization of the viral genomes was dependent on intact PML-NBs, demonstrating that PML-  
65 NBs contribute to an essential part of the chromatinization of the latent/quiescent HSV-1 genomes.  
66 Overall, this study shows that the chromatinization of latent HSV-1 involves a PML-NB/histone  
67 H3.3/histone H3.3 chaperone axis that confers and probably maintains epigenetic marks on viral  
68 genomes.

69 Results

70

71 The HIRA complex components accumulate in the vDCP-NBs

72 The formation of vDCP-NBs is a molecular hallmark of HSV-1 latency, and vDCP-NBs are  
73 present in infected neurons from the initial stages of latency establishment to latency *per se* in  
74 mouse models [15,16]. Using a previously established *in vitro* latency system [39] consisting of  
75 human primary fibroblast cultures infected by a replication-deficient virus (hereafter called  
76 *in1374*) unable to express functional VP16, ICP4 and ICP0, we and others were able to reproduce  
77 the formation of vDCP-NBs [16,38]. We first verified that vDCP-NBs induced in human foreskin  
78 fibroblast (BJ) and other human primary cells infected by *in1374* at a non-permissive temperature  
79 of 38.5°C, contained, in addition to PML, the proteins constitutively found in the PML-NBs, i.e.,  
80 Sp100, DAXX, ATRX, SUMO-1 and SUMO-2/3 (Fig. S1Ai to vi, and Table S1). The DAXX/ATRX  
81 complex is one of the two chaperones of the histone variant H3.3 involved in the replication-  
82 independent chromatinization of specific, mostly heterochromatic, genome loci [43]. Interestingly,  
83 HSV-1 enters the nucleus of the infected cell as a naked/non-nucleosomal dsDNA and remains  
84 during latency as a circular chromatinized episome unintegrated in the host genome [28,44]. It is  
85 thus tempting to speculate that the presence of DAXX/ATRX in the vDCP-NBs could be linked to a  
86 process of initiation and/or maintenance of chromatinization of the latent/quiescent viral genome.  
87 The other H3.3 chaperone is known as the HIRA complex and was initially described as specific for  
88 the replication-independent chromatinization of euchromatin regions [31,45]. Remarkably,  
89 proteins of the HIRA complex are able to bind in a sequence-independent manner to a naked/non-  
90 nucleosomal DNA [46], suggesting that the HIRA complex could also participate in the recognition  
91 and chromatinization of the incoming naked HSV-1 genome. We thus investigated the localization  
92 of all members of the HIRA complex and found that they co-localize with the latent/quiescent HSV-  
93 1 genomes at 2 days post-infection (dpi) in BJ and other human primary cells (Figure 1 Ai to iv,  
94 Table S1). To confirm that the co-localization of members of the HIRA complex with the  
95 latent/quiescent HSV-1 could be reproduced in neuronal cells, adult mouse TG neuron cultures

96 were infected with *in1374* for 2 days before performing immuno-FISH. Mouse Hira, which was the  
97 only protein of the HIRA complex detectable in mouse cells, showed a clear co-localization with a  
98 subset of viral genomes (Fig. 1B). To analyze whether this co-localization was also reproducible *in*  
99 *vivo*, immuno-FISH was performed on TG samples from HSV-1-infected mice. Hira was found to co-  
00 localize with HSV-1 genomes with the “multiple acute”/vDCP-NB pattern (see [16,47] in TG  
01 neurons from infected mice at 6 dpi (Fig. 1C) but not with the “single”/vDCP-NB pattern (see  
02 [15,47] at 28 dpi (Fig. 1D), suggesting a dynamic association of this protein with the vDCP-NBs.

03 To analyze this dynamic association, co-localizations between incoming HSV-1 genomes and  
04 proteins of the PML-NBs or of the HIRA complex were quantified at early times from 30 min pi to 6  
05 hpi using a synchronized infection procedure (Fig. 1E and Table S2). Except for the proteins of the  
06 HIRA complex, the percentages of co-localization increased with time. Interestingly, at 30 min pi,  
07 the percentage of co-localization of HSV-1 genomes with HIRA was significantly higher than with  
08 PML ( $41\pm 7\%$  vs  $23\pm 5\%$ ,  $p$  value = 0.03, Student’s *t*-test, Table S2). Although DAXX and ATRX also  
09 showed, on average, a greater percentage of co-localization with HSV-1 genomes ( $36\pm 7\%$  and  
10  $34\pm 5\%$  at 30 min, respectively) compared with PML, the data were not significant (Table S2). The  
11 absence of co-localization of mouse Hira with viral genomes with the “single”/vDCP-NB pattern in  
12 mouse TG neurons at 28 dpi suggests that longer infection times could lead to loss of proteins of the  
13 HIRA complex from the vDCP-NBs. Infection of BJ cells were reiterated as above, but this time  
14 quantifications were performed from 24 hpi to 7 dpi. Strikingly, whereas all the proteins  
15 permanently present in the PML-NBs remained co-localized with a maximum of 100% of the  
16 latent/quiescent HSV-1 genome from 2 dpi until 7 dpi, proteins of the HIRA complex peaked at 2  
17 dpi, and then their co-localization decreased at longer times pi, confirming the temporary  
18 association of the HIRA complex with the vDCP-NBs (Figure 1F, and Table S3).

19 To definitively show that proteins of the HIRA complex were present in vDCP-NBs, immuno-  
20 FISH were performed on BJ cells infected for 2 days with *in1374* to detect either member of the  
21 HIRA complex, HSV-1 genomes, and PML. Strikingly, whereas in non-infected cells proteins of the  
22 HIRA complex showed predominant nucleoplasmic staining (Fig. 2i, iii, v, vii), in infected cells all

23 the proteins clearly and systematically accumulated in PML-NBs (Fig. 2ii, iv, vi, viii). Consequently,  
24 HIRA, UBN1, CABIN1 and ASF1a co-localized with the latent/quiescent HSV-1 genomes in vDCP-  
25 NBs (arrows in Fig. 2ii, iv, vi, viii). Altogether, these data show that both DAXX/ATRAX and HIRA  
26 complexes are present within vDCP-NBs in neuronal and non-neuronal cells, suggesting a role for  
27 these two complexes in latent/quiescent HSV-1 chromatinization.

28

### 29 Histone H3.3 chaperones interact with incoming viral genome

30 The co-localization of proteins of the DAXX/ATRAX and HIRA complexes with the incoming  
31 HSV-1 genomes and their presence in the vDCP-NBs suggested an interaction of these proteins with  
32 the viral genome, which we tested by chromatin immunoprecipitation (ChIP) assays. Since DAXX,  
33 HIRA, and UBN1 antibodies were not efficient in the ChIP experiments, we constructed cell lines  
34 stably expressing myc-DAXX, HIRA-HA, or HA-UBN1 by transduction of BJ cells with the respective  
35 lentivirus-expressing vectors (Fig. S2). Cells were infected with *in1374* at 38.5°C and harvested to  
36 perform ChIP-qPCR on multiple loci spread over the HSV-1 genome (Fig. 3A). Significant  
37 enrichments compared to controls were detected for HIRA and UBN1 on several loci, confirming  
38 the interaction of these proteins with latent/quiescent HSV-1 genomes. Although ATRAX bound to  
39 the viral genome, DAXX was not found significantly enriched, but we cannot exclude an alteration of  
40 the chromatin binding capacities of the tagged protein. Overall the ChIP-qPCR data confirmed the  
41 interaction of proteins of both the DAXX/ATRAX and HIRA complexes with incoming vDCP-NBs-  
42 associated HSV-1 latent/quiescent genomes.

43

### 44 H3.3 is present in the vDCP-NBs and interacts with latent/quiescent HSV-1 genomes

45 The co-localization of the two histone H3.3 chaperone complexes with viral genomes  
46 suggested the chromatinization of HSV-1 latent genome with the histone variant H3.3. Histones  
47 H3.1 and H3.3 differ by only 5 amino acids, and, in our hands, no suitable antibody is available that  
48 can distinguish both histones by IF or IF-FISH. We constructed lentivirus-transduced BJ cell lines  
49 expressing a tagged version of either histone (e-H3.1 and e-H3.3) (see Materials and Methods, and

50 [36], Fig. S3A and B). We confirmed that ectopic expression of e-H3.3 led to its accumulation in  
51 PML-NBs unlike e-H3.1 (Fig. S3C) [35,36]. *In1374* infection of BJ e-H3.1/3-expressing cells led to  
52 the co-localization of viral genomes almost exclusively with e-H3.3 (Fig. 4Ai and ii, and B).  
53 Importantly, e-H3.3 co-localized with HSV-1 genomes together with PML in vDCP-NBs (Fig. 4C). The  
54 lack of co-localization of viral genomes with e-H3.1 was in accordance with the absence of detection  
55 of either H3.1 CAF-1 chaperone subunits (p150, p60, p48) in the vDCP-NBs (Fig. 4D, Table S1). To  
56 confirm that e-H3.3, unlike e-H3.1, interacted with HSV-1 genomes, ChIP experiments followed by  
57 qPCR were conducted on the same loci than those analyzed above. As expected, e-H3.3, but not e-  
58 H3.1, was highly enriched on the viral genome independently of the examined locus (Fig. 4E). To  
59 confirm that this discrepancy between e-H3.3 and e-H3.1 binding to viral genomes was not due to  
60 the ectopic expression of either protein, we performed a similar experiment using antibodies  
61 against native proteins. One specific antibody for H3.3 and working in ChIP experiments has been  
62 described [48]. Thus, we performed ChIP using antibodies against native H3.1/2 or H3.3 in normal  
63 BJ, or BJ e-H3.3 cells infected for 24 h by *in1374*. The results were similar to those obtained in  
64 infected BJ e-H3.3 using the anti-HA antibody, with a slightly better efficiency of the anti-HA  
65 antibody (Fig. S4A and B). These data confirmed that no bias was introduced in the ChIP  
66 experiments due to the use of tagged histones, and that latent/quiescent HSV-1 genomes are  
67 chromatinized with H3.3.

68

### 69 Depletion of DAXX, ATRX, HIRA or UBN1 mildly affects HSV-1 genomes chromatinization with H3.3

70 To analyze the requirement of the histone H3.3 chaperones for the formation of the vDCP-  
71 NBs and HSV-1 chromatinization, DAXX, ATRX, HIRA or UBN1 were depleted by shRNAs in normal  
72 BJ cells or cells constitutively expressing e-H3.3 prior to infection with *in1374* and completion of  
73 the experiments. The two tested shRNAs for each protein significantly diminished mRNA and  
74 protein quantities in BJ cells (Fig. S5A and B). None of the shRNA impacted the detection of PML-  
75 NBs, suggesting that PML-NBs were potentially functional in the absence of either protein (Fig. S6).  
76 We first measured the impact of the depletion of each protein on the co-localization of HSV-1

77 genomes with PML. Both shRNAs for each protein provided similar results, i.e., a significant  
78 decrease in the co-localization between HSV-1 genomes and PML and thus a decrease in the  
79 formation and/or stability of the vDCP-NBs (Fig. 5A and B, Table S4). The absence of HIRA had a  
80 much weaker effect compared to the three others. These data showed that the inactivation of either  
81 H3.3 chaperone complex by removal of one of its component affected to a certain extent the fate of  
82 vDCP-NBs suggesting a dependency between the activity of each H3.3 chaperone complex and the  
83 formation and/or maintenance of the vDCP-NBs.

84 We then analyzed the potential impact of the loss of vDCP-NB stability on the H3.3-  
85 dependent HSV-1 chromatinization. We performed H3.3 ChIP in *in1374*-infected BJ e-H3.3 cells that  
86 had been previously depleted for DAXX, ATRX, HIRA or UBN1 using one of the previously validated  
87 shRNAs (Fig. S7A and B). ChIP-qPCR showed that the depletion of chaperones had overall only a  
88 mild impact on the number of loci showing a significant decrease in H3.3 association. Although  
89 depletion of HIRA had a more profound impact on H3.3 deposition than depletion of UBN1 or ATRX,  
90 the depletion of DAXX showed no significant effect (Fig. 5C, Table S5). Thus, the inactivation of  
91 individual components of each H3.3 chaperone complex, although having some impact on the  
92 association of some loci with H3.3, does not seem sufficient to completely abolish the process of  
93 HSV-1 chromatinization. These results suggest that ATRX/DAXX may compensate for the loss of  
94 HIRA and vice versa.

95

#### 96 PML-NBs are essential for H3.3 chromatinization of latent/quiescent HSV-1 genomes

97 The above experiments were conducted in a context where the cells, although deficient for  
98 the activity of one H3.3 chaperone complex at a time, still contained intact PML-NBs accumulating  
99 e-H3.3 (Fig. S6 and S8). Therefore, we hypothesized that the accumulation of H3.3 within the PML-  
00 NBs could be one of the key events acting upstream of the H3.3 chaperone complex activity for the  
01 induction of chromatinization of the latent/quiescent HSV-1 by H3.3. Thus, we analyzed the HSV-1  
02 chromatinization in cells lacking PML-NBs. We had previously analyzed the impact of PML  
03 depletion on the co-localization of the DAXX/ATRX and HIRA chaperone complexes with the HSV-1



04 genomes. In a previous study conducted in HSV-1 latently infected PML KO mice, we showed that  
05 the absence of PML significantly impacted the number of latently infected TG neurons showing the  
06 “single”/vDCP-NB HSV-1 pattern and favored the detection of neurons containing the “multiple-  
07 latency” pattern prone to LAT expression [15,47]. We analyzed the very few neurons showing a  
08 “single”/vDCP-NB-like pattern in the latently infected PML KO mice for the co-localization of DAXX  
09 and ATRX with the viral genomes. We could not detect any of the two proteins co-localizing with  
10 the latent HSV-1 genomes (Fig. 6Ai to vi). Although informative, these *in vivo* studies did not allow  
11 analysis of the real impact of the absence of PML on the co-localization of the other PML-NB-  
12 associated proteins with latent HSV-1 genomes because the neurons showing the “single”/vDCP-  
13 NB-like pattern were too few to quantify the effect. We thus depleted PML in normal BJ cells using a  
14 PML shRNA-expressing lentivirus transduction. We verified the efficiency of the shRNAs against  
15 PML in normal BJ cells by IF, RT-qPCR and WB (Figure S9A-C). PML-depleted BJ cells were  
16 superinfected with *in1374*, and immuno-FISH was performed at 2 dpi to analyze the co-localization  
17 of HSV-1 genomes with DAXX, ATRX, HIRA, and UBN1 (Fig. 6B). Both PML shRNAs provided similar  
18 results. The quantification of the data showed that, similarly to the *in vivo* situation, the depletion of  
19 PML significantly decreased the co-localization of DAXX and ATRX with latent/quiescent HSV-1  
20 genomes, leaving HIRA and UBN1 unaffected for their co-localization (Fig. 6C, and Table S6). Thus,  
21 we analyzed whether the deficit of DAXX/ATRX co-localization with the latent/quiescent HSV-1  
22 genomes as a consequence of the absence of PML-NBs could impact the chromatinization of HSV-1  
23 with H3.3.

24 We first generated BJ e-H3.3 cells depleted for PML by shRNA-expressing lentivirus  
25 transduction similarly to the BJ cells (Figure S9D-E). BJ e-H3.3 control or PML-depleted cells were  
26 superinfected with *in1374* to perform immuno-FISH to analyze the co-localization of HSV-1  
27 genomes with H3.3 (Fig. 7A). Quantification of the data clearly showed a significant decrease in the  
28 co-localization of latent/quiescent HSV-1 genomes with H3.3 compared with the controls (Fig. 7B),  
29 suggesting an impact of the absence of PML-NBs on the latent/quiescent HSV-1 association with  
30 H3.3. To complement these results at a more quantitative level, we performed ChIP-qPCR

31 experiments on e-H3.3. The data clearly showed a significant impact of the absence of PML-NBs on  
32 the H3.3 association with multiple viral loci, with a depletion of H3.3 in all the analyzed loci  
33 excluding one (Fig. 7C, Table S7), which could not be due to an indirect effect of PML depletion on  
34 H3.3 stability because e-H3.3 protein levels were similar in control cells and cells depleted for PML  
35 (Fig. 7D). Both PML shRNAs provided similar results. To confirm that the absence of PML had an  
36 impact on the H3.3 association with latent/quiescent viral genomes, we performed CHIP on *in1374*-  
37 infected control mouse embryonic fibroblast (MEF) *pml*<sup>+/+</sup> or MEF *pml*<sup>-/-</sup> cells previously  
38 engineered by lentiviral transduction to express e-H3.3 (Fig. 7E). The data confirmed the deficit of  
39 an association of e-H3.3 with the latent/quiescent viral genomes in the absence of PML (Fig. 7F).  
40 Finally, we wanted to analyze whether the deficit of the H3.3 association with the viral genome in  
41 the absence of PML could be compensated by an increase of H3.1 on viral loci. The data from BJ e-  
42 H3.1 cells depleted for PML and infected with *in1374* showed that H3.1 did not replace H3.3 on the  
43 same analyzed viral loci (Fig. S10). Altogether, these data demonstrate the essential role of PML-  
44 NBs, probably through the DAXX/ATR complex activity, in the exclusive H3.3 chromatinization of  
45 incoming viral genomes forced to adopt a vDCP-NB-associated latent/quiescent pattern due to a  
46 deficit in the onset of lytic cycle.

47

48 Discussion

49 The HSV-1 genome enters the nucleus of infected neurons, which support HSV-1 latency as a  
50 naked/non-nucleosomal DNA. Many studies have described the acquisition of chromatin marks on  
51 the viral genome concomitantly to the establishment, and during the whole process, of latency.  
52 Paradoxically, although it is undisputable that these chromatin marks will predominantly be  
53 associated with latency and reactivation, few data are available for the initiation of the  
54 chromatinization of the incoming viral genome. Here, we demonstrate the essential contribution of  
55 PML-NBs in the process of chromatinization of incoming HSV-1 genomes meant to remain in a  
56 latent/quiescent state. We showed that PML-NBs are essential for the association of the histone  
57 variant H3.3 with the latent/quiescent HSV-1.

58 Two members of the HIRA complex, HIRA and ASF1a, were previously shown to be involved  
59 in H3.3-dependent chromatinization of HSV-1 genomes at early times after infection in non-  
60 neuronal and non-primary cells favoring the onset of the lytic cycle [49,50]. Our *in vivo* data in TG  
61 neurons and *in vitro* data in infected human primary fibroblasts or adult mice TG neuron cultures,  
62 show that all the proteins of the HIRA complex accumulate within specific nucleoprotein structures  
63 called the viral DNA-containing PML-NBs or vDCP-NBs. vDCP-NB is a transcriptionally silent HSV-1  
64 genome pattern that we previously demonstrated *in vivo* to be associated with the establishment of  
65 latency from the early steps of neuron infection [16]. Additionally, our data show that (i) the mouse  
66 Hira protein *in vivo*, and all the components of the HIRA complex in cultured cells, accumulate in  
67 vDCP-NBs temporarily, and (ii) significantly greater amount of incoming HSV-1 genomes co-localize  
68 with HIRA compared with PML at very early times pi (30 min). These data suggest that the HIRA  
69 complex could also be involved to some extent in the establishment of HSV-1 latency by the initial  
70 recognition of the incoming naked/non-nucleosomal viral DNA and the chromatinization of non-  
71 replicative HSV-1 genomes intended to become latent. In this respect, a recent study suggested an  
72 anti-viral activity associated with HIRA against HSV-1 and murine cytomegalovirus lytic cycles [51].

73 Interestingly, all the proteins of the HIRA complex have been previously shown to be able to  
74 directly bind to naked DNA in a sequence-independent manner, in contrast to DAXX and ATRX

75 proteins [46]. Nevertheless, our ChIP data highlighted some specific viral genome loci that interact  
76 at least with ATRX. Thus, it is likely that ATRX, unlike HIRA and UBN1, indirectly binds to the viral  
77 genome. The gamma-interferon-inducible protein 16 (IFI16), a member of the PYHIN protein  
78 family, has been described as a nuclear sensor of incoming herpesviruses genomes and suggested  
79 to promote the addition of specific chromatin marks that contribute to viral genome silencing [52-  
80 59]. A proteomic study determining the functional interactome of human PYHIN proteins revealed  
81 the possible interaction between ATRX and IFI16 [60]. Thus, it will be interesting to determine in  
82 future studies if IFI16 and H3.3 chaperone complexes physically and functionally cooperate in the  
83 process of chromatinization of the latent/quiescent HSV-1 genome.

84 One of the main finding of our study is the demonstration of the implication of PML-NBs in  
85 the H3.3-dependent chromatinization of the latent/quiescent HSV-1 genomes. A close link between  
86 PML-NBs and H3.3 in chromatin dynamics has been demonstrated during oncogene-induced  
87 senescence (OIS). In OIS, expression of the oncogene H-RasV12 induces DAXX-dependent  
88 relocalization of neo-synthesized H3.3 in the PML-NBs before a drastic reorganization of the  
89 chromatin to form senescence-associated heterochromatin foci [35,36]. Hence, the implication of  
90 the PML-NBs in the deposition of H3.3 on specific cellular chromatin loci has also been reported  
91 [36,37]. The present study shows that the absence of Pml in HSV-1wt latently infected Pml KO mice,  
92 or the depletion of PML by shRNA in BJ cells infected with *in1374*, significantly affects the co-  
93 localization of DAXX and ATRX, but not HIRA and UBN1, with latent/quiescent HSV-1 genomes,  
94 confirming previous studies for DAXX/ATRAX [38]. Taken together with the deficit of the H3.3  
95 association with the viral genomes in the absence of PML-NBs, these data suggest that a significant  
96 part of the latent/quiescent HSV-1 genome chromatinization by H3.3 could occur through the  
97 activity of the DAXX/ATRAX complex in association with the PML-NBs.

98 Given the particular structure formed by the latent/quiescent HSV-1 genome with the PML-  
99 NBs, our study raises the question of the possible acquisition of chromatin marks in the vDCP-NBs.  
00 The depletion of H3.3, which almost exclusively participates in latent/quiescent HSV-1 genome  
01 chromatinization, does not prevent the formation of vDCP-NBs and is rather in favor of such a

02 scenario (Fig. S11). It is unlikely that a possible replacement of H3.3 by the canonical H3.1 for the  
03 chromatinization of the incoming HSV-1 genomes could occur prior to the association with vDCP-  
04 NBs. Indeed, our multiple immuno-FISH and ChIP assays failed to detect H3.1 and/or H3.1  
05 chaperones that associate or co-localize with viral genomes. Nonetheless, we cannot rule out a  
06 possible replacement of H3.3 with another H3 variant.

07 Even if a process of viral genome chromatin assembly and/or maintenance occurs in the  
08 vDCP-NBs, some of our data tend to show that it unlikely represents the only pathway for  
09 chromatinization of the incoming naked HSV-1 genomes. Indeed, the depletion of DAXX, ATRX,  
10 UBN1 and to a lesser extent HIRA, significantly impacts the co-localization of the latent/quiescent  
11 HSV-1 genomes with PML, and hence the formation of vDCP-NBs, but only mildly affects the H3.3  
12 association with the analyzed viral genome loci. However, beyond a compensatory mechanism  
13 between the two complexes that could bypass the requirement of the vDCP-NBs, we cannot exclude  
14 the possible contribution of other PML-NB-associated proteins involved in H3.3 chromatinization,  
15 as shown for the DEK protein [61]. Moreover, our data show that the depletion of DAXX, ATRX,  
16 HIRA, or UBN1 does not modify the accumulation of e-H3.3 at PML-NBs, leaving intact the upstream  
17 requirement of H3.3 accumulation in PML-NBs for H3.3-dependent viral chromatin assembly. We  
18 have recently shown that vDCP-NBs are dynamic structures that can fuse during the course of a  
19 latent infection [16]. It is thus possible that incoming viral genomes can be dynamically associated  
20 with vDCP-NBs to be chromatinized, and in the absence of one of the components of either H3.3  
21 chaperone complex, this dynamic can be perturbed, resulting in some viral genomes that are not co-  
22 localized with PML. Given that depletion of none of the four proteins affects the structure of the  
23 PML-NBs, and considering the essential role of PML-NBs in the H3.3 chromatinization of the viral  
24 genomes, this possibility cannot be ruled out.

25 Altogether, our study demonstrates the essential role of a PML-NB/H3.3/H3.3 chaperone  
26 axis in the process of chromatinization of viral genomes adopting a vDCP-NB pattern, which  
27 represents an essential structural and functional aspect of HSV-1 latency establishment.

28

## 29 Materials and Methods

30

### 31 Ethics Statement

32 All procedures involving experimental animals conformed to the ethical standards of the  
33 Association for Research in Vision and Ophthalmology (ARVO) statement for the use of animals in  
34 research and were approved by the local Ethics Committee of the Institute for Integrative Biology of  
35 the Cell (I2BC) and the Ethics Committee for Animal Experimentation (CEEA) 59 (Paris I) under  
36 number 2012-0047 and in accordance with European Community Council Directive 2010/63/EU.  
37 For animal experiments performed in the USA: animals were housed in American Association for  
38 Laboratory Animal Care-approved housing with unlimited access to food and water. All procedures  
39 involving animals were approved by the Children's Hospital Animal Care and Use Committee and  
40 were in compliance with the Guide for the Care and Use of Laboratory Animals (protocol number:  
41 IAUC2013-0162 of 2/28/2107 (yearly annual approval)).

42

43 Virus strains, mice and virus inoculation: primary mouse TG neuron cultures, cells

44 The HSV-1 SC16 strain was used for mouse infections and has been characterized previously  
45 [62]. The HSV-1 mutant *in1374* is derived from the 17 *syn* + strain and expresses a temperature-  
46 sensitive variant of the major viral transcriptional activator ICP4 [63] and is derived from *in1312*, a  
47 virus derived from the VP16 insertion mutant *in1814* [64], which also carries a deletion/frameshift  
48 mutation in the ICP0 open reading frame [65] and contains an HCMV-*lacZ* reporter cassette  
49 inserted into the UL43 gene of *in1312* [66]. This virus has been used and described previously  
50 [16,38]. All HSV-1 strains were grown in baby hamster kidney (BHK-21, American Type Culture  
51 Collection, ATCC CCL-10) cells and titrated in human osteosarcoma (U2OS, ATCC HTB-96) cells.  
52 *In1374* was grown and titrated at 32°C in the presence of 3 mM hexamethylene bisacetamide [67].  
53 PML wild-type, and knockout mice were obtained from the NCI Mouse Repository (NIH,  
54 <http://mouse.ncicrf.gov>; strain, 129/Sv-*Pm*<sup>*tm1Ppp*</sup>) [68]. Genotypes were confirmed by PCR,  
55 according to the NCI Mouse Repository guidelines with primers described in [15].

56

57 Mice were inoculated and TG processed as described previously [15] Maroui et al., 2016}. Briefly,  
58 for the lip model: 6-week-old inbred female BALB/c mice (Janvier Labs, France) were inoculated  
59 with  $10^6$  PFU of SC16 virus into the upper-left lip. Mice were sacrificed at 6 or 28 dpi. Frozen  
60 sections of mouse TG were prepared as described previously [15,69]. For the eye model:  
61 inoculation was performed as described previously [70]. Briefly, prior to inoculation, mice were  
62 anesthetized by intra-peritoneal injection of sodium pentobarbital (50 mg/kg of body weight). A  
63 10- $\mu$ L drop of inoculum containing  $10^5$  PFU of 17syn+ was placed onto each scarified corneal  
64 surface. This procedure results in ~80% mouse survival and 100% infected TG.

65

66 Primary mouse TG neuron cultures were established from OF1 male mice (Janvier lab), following a  
67 previously described procedure {Maroui et al., 2016}. Briefly, 6–8-week-old mice were sacrificed  
68 before TG removal. TG were incubated at 37°C for 20 min in papain (25 mg) (Worthington)  
69 reconstituted with 5 mL Neurobasal A medium (Invitrogen) and for 20 min in Hank's balanced salt  
70 solution (HBSS) containing dispase (4.67 mg/mL) and collagenase (4 mg/mL) (Sigma) on a rotator,  
71 and mechanically dissociated. The cell suspension was layered twice on a five-step OptiPrep  
72 (Sigma) gradient, followed by centrifugation for 20 min at 800 *g*. The lower ends of the centrifuged  
73 gradient were transferred to a new tube and washed twice with Neurobasal A medium  
74 supplemented with 2% B27 supplement (Invitrogen) and 1% penicillin–streptomycin (PS). Cells  
75 were counted and plated on poly-D-lysine (Sigma)- and laminin (Sigma)-coated, eight-well chamber  
76 slides (Millipore) at a density of 8,000 cells per well. Neuronal cultures were maintained in  
77 complete neuronal medium consisting of Neurobasal A medium supplemented with 2% B27  
78 supplement, 1% PS, L-glutamine (500  $\mu$ M), nerve growth factor (NGF; 50 ng/mL, Invitrogen), glial  
79 cell-derived neurotrophic factor (GDNF; 50 ng/mL, PeproTech), and the mitotic inhibitors  
80 fluorodeoxyuridine (40  $\mu$ M, Sigma) and aphidicolin (16.6  $\mu$ g/mL, Sigma) for the first 3 days. The  
81 medium was then replaced with fresh medium without fluorodeoxyuridine and aphidicolin.

82



83 Primary human foreskin (BJ, ATCC, CRL-2522), lung (IMR-90, Sigma, 85020204), fetal foreskin  
84 (HFFF-2, European Collection of Authenticated Cell Cultures, ECACC 86031405, kind gift from  
85 Roger Everett, CVR-University of Glasgow) fibroblast cells, primary human hepatocyte (HepaRG,  
86 HPR101, kind gift from Olivier Hantz & Isabelle Chemin, CRCL, Lyon, France) cells, human  
87 embryonic kidney (HEK 293T, ATCC CRL-3216) cells, U2OS, mouse embryonic fibroblast (MEF) *pml*  
88 +/-, MEF *pml* -/- cells (kind gift from Valérie Lallemand, Hopital St Louis, Paris), and BHK-21 cells  
89 were grown in Dulbecco's Modified Eagle's Medium (DMEM) supplemented with 10% fetal bovine  
90 serum (Sigma, F7524), L-glutamine (1% v/v), 10 U/mL penicillin, and 100 mg/mL streptomycin. BJ  
91 cell division is stopped by contact inhibition. Therefore, to limit their division, cells were seeded at  
92 confluence before being infected at a multiplicity of infection (m.o.i.) of 3, and then maintained in  
93 2% serum throughout the experiment. Infections of BJ cells for short times (from 30 min to 6 h)  
94 were performed by synchronizing the infection process with a pre-step of virus attachment to the  
95 cells at 4°C for one hour. The infection medium was then removed, and the temperature was shifted  
96 to 37°C to allow a maximum of viruses to simultaneously penetrate into the cells.

97

#### 98 Frozen sections

99 Frozen sections of mouse TG were generated as previously described [69]. Mice were  
00 anesthetized at 6 or 28 d.p.i., and before tissue dissection, mice were perfused intra-cardially with a  
01 solution of 4% formaldehyde, 20% sucrose in 1X PBS. Individual TG were prepared as previously  
02 described [69], and 10- $\mu$ m frontal sections were collected in three parallel series and stored at -  
03 80°C.

04

#### 05 DNA-FISH and immuno-DNA FISH

06 HSV-1 DNA FISH probes consisting of cosmids 14, 28 and 56 [71] comprising a total of ~90  
07 kb of the HSV-1 genome were labeled by nick-translation (Invitrogen) with dCTP-Cy3 (GE  
08 Healthcare) and stored in 100% formamide (Sigma). The DNA-FISH and immuno-DNA FISH  
09 procedures have been described previously [15,69]. Briefly, infected cells or frozen sections were

10 thawed, rehydrated in 1x PBS and permeabilized in 0.5% Triton X-100. Heat-based unmasking was  
11 performed in 100 mM citrate buffer, and sections were post-fixed using a standard methanol/acetic  
12 acid procedure and dried for 10 min at RT. DNA denaturation of the section and probe was  
13 performed for 5 min at 80°C, and hybridization was carried out overnight at 37°C. Sections were  
14 washed 3 x 10 min in 2 x SSC and for 3 x 10 min in 0.2 x SSC at 37°C, and nuclei were stained with  
15 Hoechst 33258 (Invitrogen). All sections were mounted under coverslips using Vectashield  
16 mounting medium (Vector Laboratories) and stored at 4°C until observation.

17 For immuno-DNA FISH, cells or frozen sections were treated as described for DNA-FISH up to the  
18 antigen-unmasking step. Tissues were then incubated for 24 h with the primary antibody. After  
19 three washes, secondary antibody was applied for 1 h. Following immunostaining, the cells were  
20 post-fixed in 1% PFA, and DNA FISH was carried out from the methanol/acetic acid step onward.

21 The same procedures were used for infected neuronal cultures except that the cells were fixed in  
22 2% PFA before permeabilization.

23

#### 24 Western blotting

25 Cells were collected in lysis buffer (10 mM Tris-EDTA, pH 8.0) containing a protease  
26 inhibitor cocktail (Complete EDTA-free; Roche) and briefly sonicated. Protein extracts were  
27 homogenized using QiaShredders (Qiagen). The protein concentration was estimated by the  
28 Bradford method. Extracted proteins were analyzed by Western blotting using appropriate  
29 antibodies (see below).

30

#### 31 Microscopy, imaging, and quantification

32 Observations and most image collections were performed using an inverted Cell Observer  
33 microscope (Zeiss) with a Plan-Apochromat ×100 N.A. 1.4 objective and a CoolSnap HQ2 camera  
34 from Molecular Dynamics (Roper Scientific) or a Zeiss LSM 800 confocal microscope. Raw images  
35 were processed using ImageJ software (NIH).

36

37 Lentivirus and retrovirus production and establishment of cell lines

38 BJ or MEF cell lines expressing H3.1-SNAP-HAx3 (e-H3.1), H3.3-SNAP-HAx3 (e-H3.3), or  
 39 Myc-hDAXX were established by retroviral transduction [72]. Briefly, pBABE plasmids encoding  
 40 H3.1-SNAP-HAx3 or H3.3-SNAP-HAx3 (gift from Dr Jansen), pLNCX2 encoding Myc-hDAXX [36],  
 41 were co-transfected with pCL-ampho (for subsequent transduction of BJ cells) or pCL-eco (for  
 42 subsequent transduction of MEF cells) plasmids [73] by the calcium phosphate method into HEK  
 43 293T cells to package retroviral particles [74]. BJ cells stably expressing HIRA-HA and HA-UBN1 or  
 44 transiently expressing the shRNAs were established by lentiviral transduction. Briefly, pLenti  
 45 encoding HIRA-HA or HA-UBN1, pLKO empty, pLKO shPML\_01, 02, shDAXX\_01, 02, shATRX\_01, 02,  
 46 shHIRA\_01, 02, shUBN1\_01, 02, were co-transfected with psPAX.2 and pMD2.G plasmids by the  
 47 calcium phosphate method into HEK 293T cells to package lentiviral particles. After 48 h,  
 48 supernatant containing replication-incompetent retroviruses or lentiviruses was filtered and  
 49 applied for 24 h on the target BJ or MEF cells in a medium containing polybrene 8 µg/mL (Sigma)  
 50 [72]. Stable transfectants were selected with Blasticidin S (5 µg/mL, Sigma), puromycin (1 µg/mL,  
 51 Sigma), or neomycin (G418, 1 mg/mL, Millipore) for 3 days, and a polyclonal population of cells was  
 52 used for all experiments.

| Plasmids                        | Origin                                         | Target sequences          |
|---------------------------------|------------------------------------------------|---------------------------|
| pLKO1-puro shCTRL               | Sigma SHC002 lot 01181209MN                    | CCGGCAACAAGATGAAGAGCACCAA |
| pLKO1-puro shPML_01             | Sigma TRCN 0000003867 NM_002675 x-<br>1497s1c1 | GCCAGTGTACGCCTTCTCCAT     |
| pLKO1-puro shPML_02             | Sigma TRCN 0000003869 NM_002675 x-<br>1501s1c1 | GTGTACGCCTTCTCCATCAAA     |
| pLKO1-puro shATRX_01            | Sigma TRCN 0000013590 NM_00489 2-<br>2215s1c1  | CGACAGAAACTAACCCCTGTAA    |
| pLKO1-puro shATRX_02            | Sigma TRCN 0000342811 NM_00489 3-<br>2357s21c1 | GATAATCCTAAGCCTAATAAA     |
| pSuper.retro.puro-<br>shDAXX_01 | [75]                                           | GGAGUUGGAUCUCUCAGAA       |

|                      |                                                 |                       |
|----------------------|-------------------------------------------------|-----------------------|
| pLKO1-puro shDAXX_02 | Sigma TRCN 0000003802 NM-001350 x-<br>2285s1c1  | GCCACACAATGCGATCCAGAA |
| pLKO1-puro shHIRA_01 | Sigma TRCN 0000232156 NM_003325 3-<br>592s21c1  | CTCTATCCTCCGGAATCATTC |
| pLKO1-puro shHIRA_02 | Sigma TRCN 0000232159 NM_003325 3-<br>3073s21c1 | TGAATACCGACTTCGAGAAAT |
| pLKO1-puro shUBN1_01 | Sigma TRCN 0000235872 NM_016936 3-<br>1764s21c1 | ATGGACTCGCTGACGGATTTG |
| pLKO1-puro shUBN1_02 | Sigma TRCN 0000235871 NM_016936 3-<br>1244s21c1 | ATCCGACTCCTTCATCGATAA |

53

## 54 ChIP and quantitative PCR

55 Cells were fixed with formaldehyde 2% for 5 min at RT, and then glycine 125 mM was added  
56 to arrest fixation for 5 min. After two washes with ice-cold PBS, the cells were resuspended in  
57 buffer A (100 mM Tris HCl pH 9.4, 10 mM DTT) and subjected to two 15 min-incubations on ice  
58 then at 30°C. The cells were subsequently lysed in lysis buffer B (10 mM Hepes pH 6.5, 0.25 %  
59 Triton, 10 mM EDTA, 0.5 mM EGTA) for 5 min at 4°C to recover the nuclei. Nuclei were incubated  
60 for 5 min at 4°C in buffer C (10 mM Hepes pH 6.5, 2 M NaCl, 10 mM EDTA, 0.5 mM EGTA) and then  
61 resuspended in 380 µl of buffer D (10 mM EDTA, 50 mM Tris HCl pH 8, 1% SDS, Protease Inhibitor  
62 Cocktail (Complete EDTA-free; Roche)). Nuclei were sonicated with a Bioruptor (Diagenode) for 30  
63 cycles of 30 sec. "ON", 30 sec. "OFF". Thirty microliters of the sonication product was kept for the  
64 input, 50 µL for analyzing the sonication efficiency, and 300 µl diluted 10 times in RIPA buffer (50  
65 mM Tris-HCl pH 8, 150 mM NaCl, 2 mM EDTA pH 8, 1% NP40, 0.5% Na Deoxycholate, 0.1% SDS, PIC  
66 1x) for ChIP. Two micrograms of Ab was added and incubated overnight at 4°C. Sixty microliters of  
67 agarose beads coupled to protein A (Millipore 16-157) or G (Millipore 16-201) was added for 2 h at  
68 4°C under constant shaking. Beads were then successively washed for 5 min at 4°C under constant  
69 shaking once in "low salt" (0.1% SDS, 1% Triton X-100, 2 mM EDTA, 20 mM Tris HCl pH 8.0, 150  
70 mM NaCl) buffer, once in "high salt" (0.1% SDS, 1% Triton X-100, 2 mM EDTA, 20 mM Tris HCl pH

71 8.0, 500 mM NaCl) buffer, once in “LiCl” (0.25 mM LiCl, 1% NP40, 1% NaDOC, 1 mM EDTA, 10 mM  
 72 Tris HCl pH 8.0) buffer and twice in TE (10 mM Tris pH 8.0, 1 mM EDTA) buffer. Chromatin-  
 73 antibody complexes are then eluted twice at RT for 20 min under constant shaking with 250 µl of  
 74 elution buffer (1% SDS, 0.1 M NaHCO<sub>3</sub>). Input and IP products were de-crosslinked overnight at  
 75 65°C and then treated for 2 h at the same temperature with 20 mg/mL of proteinase K (Sigma) and  
 76 10 mg/mL of RNase A (Sigma). DNA was then purified by phenol-chloroform/ethanol precipitation,  
 77 resuspended in water, and kept at -20°C until use for qPCR or ChIPseq.  
 78 Quantitative PCR was performed using Quantifast SYBR Green mix (Stratagene) and the MX3005P  
 79 apparatus. Primers were used at a final concentration of 1 µM and were as follows:  
 80

|                       |     |                                     |
|-----------------------|-----|-------------------------------------|
| TK promoter<br>[76]   | Fwd | 5' CAGCTGCTTCATCCCCGTGG 3'          |
|                       | Rev | 5' AGATCTGCGGCACGCTGTTG 3'          |
| TK exon               | Fwd | 5' ATGCTGCCATAAGGTATCG 3'           |
|                       | Rev | 5' GTAATGACAAGCGCCAGAT 3'           |
| TK 3'UTR<br>[42]      | Fwd | 5' ACCCGCTTAACAGCGTCAACA 3'         |
|                       | Rev | 5' CCAAAGAGGTGCGGGAGTTT 3'          |
| ICP8 promoter<br>[77] | Fwd | 5' CCACGCCACCGGCTGATGAC 3'          |
|                       | Rev | 5' TGCTTACGGTCAGGTGCTCCG 3'         |
| gC promoter<br>[42]   | Fwd | 5' CGCCGGTGTGTGATGATTT 3'           |
|                       | Rev | 5' TTTATACCCGGGCCCAT 3'             |
| gC 3'UTR<br>[42]      | Fwd | 5' GGGTCCGTCCCCCAAT 3'              |
|                       | Rev | 5' CGTTAGGTTGGGGCGCT 3'             |
| VP16 promoter<br>[78] | Fwd | 5' CGGATTGGGAAACAAAGGCACGCAACGCC 3' |
|                       | Rev | 5' TTGAGGTCTTCGTCTGTG 3'            |
| ICP27 promoter        | Fwd | 5' CCACGGGTATAAGGACATCCA 3'         |
|                       | Rev | 5' GGATATGGCCTCTGGTGGTG 3'          |
| ICP27 exon<br>[79]    | Fwd | 5' GGCGACTGACATTGA 3'               |
|                       | Rev | 5' CTGCTGTCCGATTCCAGGTC 3'          |
| LAT exon 1            | Fwd | 5' GGCTCCATCGCCTTTCCT 3'            |

|               |     |                                  |
|---------------|-----|----------------------------------|
| [80]          | Rev | 5' AAGGGAGGGAGGAGGGTACTG 3'      |
| LAT intron    | Fwd | 5' CCCACGTACTCCAAGAAGGC 3'       |
|               | Rev | 5' AGACCCAAGCATAGAGAGCCAG 3'     |
| ICP0 promoter | Fwd | 5' CCGCCGACGCAACAG 3'            |
| [80]          | Rev | 5' GTTCCGGGTATGGTAATGAGTTTCT 3'  |
| ICP0 exon 1   | Fwd | 5' ATAAGTTAGCCCTGGCCCGA 3'       |
|               | Rev | 5' GCTGCGTCTCGCTCCG 3'           |
| ICP4 promoter | Fwd | 5' GTCGTGGATCCGTGTCGGCA 3'       |
| [79]          | Rev | 5' TGCCCGTTCCTCGTTAGCAT 3'       |
| LacZ exon     | Fwd | 5' GCAGCAACGAGACGTCA 3'          |
|               | Rev | 5' GAAAGCTGGCTACAGGAAG 3'        |
| Actin         | Fwd | 5' CGGGAA ATCGTGCGTGAC ATTAAG 3' |
|               | Rev | 5' GAACCGCTCATTGCCAATGGTGAT 3'   |

81

## 82 siRNA transfections

83 Transfections of BJ cells with siRNAs was performed using Lipofectamine RNAiMAX and  
 84 following the supplier's procedure (Thermo Fisher Scientific). The following siRNAs were used at a  
 85 final concentration of 40 nM for 48 h: siH3F3A: 5'-CUACAAAAGCCGCUCGCAA [81]; siH3F3B: 5'-  
 86 GCUAAGAGAGUCACCAUCA [81].

87

## 88 Antibodies

89 The following primary antibodies were used:

90

### 91 *For immunofluorescence*

| Proteins     | Origin                                        | References | Species           | Dilution |
|--------------|-----------------------------------------------|------------|-------------------|----------|
| Asf1a        | Geneviève Almouzni<br>(Institut Curie, Paris) |            | Rabbit polyclonal | 1/1000   |
| ATRX (h-300) | Santa Cruz                                    | sc-15408   | Rabbit polyclonal | 1/100    |
| c-Myc (9E10) | Santa cruz                                    | sc-40      | Mouse monoclonal  | 1/200    |

|                   |                                                |           |                   |            |
|-------------------|------------------------------------------------|-----------|-------------------|------------|
| Cabin1            | Sigma                                          | HPA043296 | Rabbit polyclonal | 1/100      |
| DAXX (M-112)      | Santa Cruz                                     | sc-7152   | Rabbit polyclonal | 1/100      |
| HA                | Abcam                                          | AB9110    | Rabbit polyclonal | 1/500-1000 |
| HA (3F10)         | Roche                                          | 1867423   | Rat monoclonal    | (1/1000)   |
| HIRA              | Abcam                                          | ab20655   | Rabbit polyclonal | 1/100      |
| HIRA (WC119)      | Millipore                                      | 04-1488   | Mouse monoclonal  | 1/100      |
| p48 (CAF-1)       | Abcam                                          | ab1765    | Rabbit polyclonal | 1/100      |
| p60 (CAF-1)       | Novus                                          | 500-207   | Mouse monoclonal  | 1/100      |
| p150 (CAF-1)      | Novus                                          | 500-212   | Mouse monoclonal  | 1/100      |
| human PML (H-238) | Santa Cruz                                     | sc-5621   | Rabbit polyclonal | 1/500      |
| human PML(PG-M3)  | Santa Cruz                                     | sc-966    | Mouse monoclonal  | 1/500      |
| human PML 5E10    | Roel Van Driel<br>(University of<br>Amsterdam) |           | Mouse monoclonal  | 1/500      |
| mouse PML         | Millipore                                      | MAB3738   | Mouse monoclonal  | 1/100      |
| Sp100             | Thomas Sternsdorf<br>(University of Hamburg)   | SpGH      | Rabbit polyclonal | 1/500      |
| SUMO-1            | Cell Signaling                                 | 4930      | Rabbit polyclonal | 1/500      |
| SUMO-1 (5B12)     | MBL                                            | M113-3    | Mouse monoclonal  | 1/500      |
| SUMO-2/3 (18H8)   | Cell Signaling                                 | 4971      | Rabbit monoclonal | 1/500      |
| SUMO-2/3 (1E7)    | MBL                                            | M114-3    | Mouse monoclonal  | 1/500      |
| UBN1 Zap1         | Henri Gruffat<br>(CIRI, ENS, Lyon)             |           | Mouse monoclonal  | 1/100      |

92 All secondary antibodies were Alexa Fluor-conjugated and were raised in goats (Invitrogen).

93

94 *For CHIP*

| Proteins     | Origin     | References | Species           |
|--------------|------------|------------|-------------------|
| ATRX (h-300) | Santa Cruz | sc-15408   | Rabbit polyclonal |
| c-Myc (9E10) | Millipore  | MABE282    | Mouse monoclonal  |
| H3.1/2       | Millipore  | ABE154     | Rabbit polyclonal |
| H3.3         | Millipore  | 09-838     | Rabbit polyclonal |



|            |           |             |                   |
|------------|-----------|-------------|-------------------|
| HA         | ABCAM     | AB9110      | Rabbit polyclonal |
| IgG Rabbit | Diagenode | Kch-504-250 | Rabbit polyclonal |

95

96 *For WB*

| <b>Proteins</b>   | <b>Origin</b>                      | <b>References</b> | <b>Species</b>    | <b>Dilution</b> |
|-------------------|------------------------------------|-------------------|-------------------|-----------------|
| human PML (H-238) | Santa Cruz                         | sc-5621           | Rabbit polyclonal | 1/1000          |
| ATRX (h-300)      | Santa Cruz                         | sc-15408          | Rabbit polyclonal | 1/1000          |
| DAXX (25C12)      | Cell Signaling                     | #4533             | Rabbit monoclonal | 1/1000          |
| HIRA (WC119)      | Millipore                          | 04-1488           | Mouse monoclonal  | 1/1000          |
| UBN1 Zap1         | Henri Gruffat<br>(CIRI, ENS, Lyon) |                   | Mouse monoclonal  | 1/250           |
| c-Myc (9E10)      | Millipore                          | MABE282           | Mouse monoclonal  | 1/1000          |
| HA                | ABCAM                              | AB9110            | Rabbit polyclonal | 1/1000          |
| Actin             | Sigma                              | A2066             | Rabbit polyclonal | 1/1000          |

97 All secondary antibodies were HRP-conjugated and were raised in goats (Sigma).

98 Acknowledgements

99 We thank Roel van Driel (University of Amsterdam, Netherland) for the PML antibody (mAb 5E10),  
00 Henri Gruffat (CIRI, ENS Lyon, France) for the UBN1 antibody, Geneviève Almouzni (Institut Curie,  
01 Paris, France) for the ASF1a antibody, Thomas Sternsdorf (University of Hamburg, Germany) for  
02 the Sp100 antibody, Roger Everett and Chris Preston (Center for Virus Research, University of  
03 Glasgow, UK) for the *in1374* virus, Wade Bresnahan (University of Texas, USA) for the  
04 pSuper.retro.puro-shDAXX\_01, Lars Jansen (Insituto Gulbenkian de Ciencia, Portugal) for the  
05 pBABE plasmids encoding H3.1-SNAP-HAx3 and H3.3-SNAP-HAx3, Olivier Hantz and Isabelle  
06 Chemin (CRCL, Lyon) for the HepaRG cells, Valérie Lallemand-Breitenbach (Hopital Saint Louis,  
07 Paris, France) for the MEF *pml*<sup>+/+</sup> and *pml*<sup>-/-</sup> cells and the Centre Technologique des Microstructures  
08 (CT $\mu$ ) of the Université Claude Bernard Lyon 1 for the confocal microscopy.

09

10

## 11 Figure legends

12

13 Figure 1. Latent/quiescent HSV-1 genomes co-localize with the HIRA complex.

14 (A) Data from immuno-FISH experiments performed in human primary fibroblasts (BJ cells) infected for 2 days with the  
15 replication-defective HSV-1 virus *in1374*. HIRA (i), UBN1 (ii), CABIN1 (iii), ASF1a (iv) (green), and HSV-1 genomes (red) were  
16 detected. Scale bars = 5  $\mu$ m.

17 (B) Data from immuno-FISH experiments performed in adult mouse primary TG neuron cultures infected for 2 days with  
18 *in1374* co-detecting mouse Hira (mHira, green) and HSV-1 genomes (red). Scale bars = 5  $\mu$ m.

19 (C) Data from immuno-FISH experiments performed in TG neurons of 6-day HSV-1wt-infected mice co-detecting mHira  
20 (green) and HSV-1 genomes (red). Nuclei (inset) were detected with DAPI (gray, blue). Scale bars = 10  $\mu$ m.

21 (D) Data from immuno-FISH experiments performed in TG neurons of 28-day HSV-1wt-infected mice co-detecting mHira  
22 (green) and HSV-1 genomes (red). Nuclei (inset) were detected with DAPI (gray, blue). Scale bars = 10  $\mu$ m.

23 (E) Quantifications from immuno-FISH experiments performed in infected BJ cells at early times post-infection with *in1374*  
24 and representing the percentage of co-localization between incoming HSV-1 genomes and representative proteins of the  
25 PML-NBs (PML, Sp100, SUMO-1, SUMO 2/3) or H3.3 chaperone complex proteins (DAXX, ATRX, HIRA, UBN1, CABIN1). Data  
26 represent means from three independent experiments  $\pm$  SD. The Student's *t*-test was applied to assess the significance of the  
27 results. \* =  $p < 0.05$  (see Table S2 for data).

28 (F) Quantifications from immuno-FISH experiments performed in infected BJ cells at late times post-infection with *in1374*  
29 and representing the percentage of co-localization between incoming HSV-1 genomes and representative proteins of the  
30 PML-NBs (PML, Sp100, SUMO-1, SUMO 2/3) or H3.3 chaperone complex proteins (DAXX, ATRX, HIRA, UBN1, CABIN1). Data  
31 represent the means from three independent experiments  $\pm$  SD (see Table S3 for data).

32

33 Figure 2. HSV-1 infection induces the accumulation of HIRA complex proteins in PML-NBs and co-localization with  
34 latent/quiescent HSV-1 genomes in vDCP-NBs. Immuno-FISH performed in BJ cells not infected (ni) (i, iii, v, vii) or infected for  
35 2 days (ii, iv, vi, viii) with *in1374*. HIRA (i and ii), UBN1 (iii and vi), CABIN1 (v and vi), ASF1a (vii and viii) (gray, green), HSV-1  
36 genomes (gray, red), and PML (gray, blue) were detected. Arrows indicate examples of the detection of HIRA complex  
37 proteins in vDCP-NBs. Scale bars = 5  $\mu$ m.

38

39 Figure 3. Components of the DAXX/ATRX and HIRA complexes associate with latent/quiescent HSV-1 genomes.

40 (A) Schematic localization of the HSV-1 genome of the loci amplified by quantitative PCR. UL: Unit Long, US: Unit Short, TRL:  
41 Terminal Repeat Long, TRS: Terminal Repeat Short, IRL: Inverted Repeat Long, IRS: Inverted Repeat Short.

42 (B) Chromatin immunoprecipitation (ChIP) associated with quantitative PCR (qPCR) performed in *in1374*-infected normal BJ  
43 cells or *in1374*-infected BJ cells expressing tagged versions of DAXX, HIRA, or UBN1. Anti-myc (DAXX) or anti-HA (HIRA and  
44 UBN1) antibodies were used. For ATRX, a native antibody was used, and the results were compared to ChIP with IgG as  
45 control. Data represent means from three independent experiments  $\pm$  SD. Student's *t*-test was applied to assess the  
46 significance of the results. \* =  $p < 0.05$ .

47

48 Figure 4. The histone variant H3.3 co-localizes and associates with latent/quiescent HSV-1 genomes.

49 (A) Data from immuno-FISH experiments performed in e-H3.1 (i) or e-H3.3 (ii)-expressing BJ cells infected for 2 days with  
50 *in1374*. E-H3.1 or e-H3.3 (green), and HSV-1 genomes (red) were detected. Scale bars = 5  $\mu$ m.

51 (B) Quantification of the immuno-FISH experiments performed in (A). Data represent means from three independent  
52 experiments  $\pm$  SD. The Student's *t*-test was applied to assess the significance of the results. \*\* =  $p < 0.01$ .

53 (C) Data from immuno-FISH experiments performed in e-H3.3-expressing BJ cells infected for 2 days with *in1374*. E-H3.3  
54 (gray, green), HSV-1 (gray, red), and PML (gray, blue) were detected. Scale bars = 5  $\mu$ m.

55 (D) Data from immuno-FISH experiments performed in normal BJ cells infected for 2 days with *in1374*. H3.1 CAF chaperone  
56 complex proteins p150 (i), p60 (ii), and p48 (iii) (green), and HSV-1 genomes (red) were detected. Nuclei were detected with  
57 DAPI (blue). Scale bars = 5  $\mu$ m.

58 (E) ChIP-qPCR performed in *in1374*-infected normal BJ cells (blue) *in1374*-infected e-H3.1 (red) or e-H3.3 (green) expressing  
59 BJ cells. Anti-HA antibody was used for ChIP experiments. Analyzed viral loci were described previously. Data represent  
60 means from three independent experiments  $\pm$  SD. The Student's *t*-test was applied to assess the significance of the results. \* =  
61  $p < 0.05$ , \*\* =  $p < 0.01$ .

62

63 Figure 5. Depletion of DAXX, ATRX, HIRA, or UBN1 significantly affects the formation of vDCP-NBs, but only mildly affects the  
64 association of H3.3 with the latent/quiescent HSV-1 genome.

65 Normal or e-H3.3-expressing BJ cells were first transduced with shRNA-expressing lentiviruses before analysis.

66 (A) Data from immuno-FISH experiments performed in BJ cells infected with *in1374* for 24 h. PML (green) and HSV-1  
67 genomes (red) were detected in lentivirus-transduced BJ cells expressing control (shCTRL) or targeted shRNAs. Scale bars =  
68 5  $\mu$ m.

69 (B) Quantifications of the immuno-FISH experiments performed in (A). Data represent means from three independent  
70 experiments  $\pm$  SD. The Student's *t*-test was applied to assess the significance of the results. \* =  $p < 0.05$ , \*\* =  $p < 0.01$  (see Table  
71 S4 for data).

72 (C) ChIP-qPCR for the detection of e-H3.3 associated with HSV-1 genomes and performed in e-H3.3-expressing BJ cells  
73 infected with *in1374* for 24 h and previously transduced with a lentivirus expressing a control shRNA (shCTRL, blue) or a

74 targeted shRNA (red). Anti-HA antibody was used for the ChIP experiments. The analyzed viral loci were described  
75 previously. Data represent means from three independent experiments  $\pm$  SD. The Student's *t*-test was applied to assess the  
76 significance of the results. \* =  $p < 0.05$  (see Table S5 for data).

77

78 Figure 6. Absence of PML decreases the co-localization of DAXX and ATRX but not HIRA and UBN1 with latent/quiescent  
79 HSV-1 genomes.

80 (A) Data from immuno-FISH experiments performed in TG tissues from *pml*<sup>+/+</sup> and *pml*<sup>-/-</sup> infected mice at 28 dpi. Pml, Daxx,  
81 Atrx (green), and HSV-1 genomes (red) were detected. Nuclei were detected with DAPI (blue). Scale bars = 10  $\mu$ m.

82 (B) Data from immuno-FISH experiments performed in BJ cells depleted of PML by transduction with a PML-targeted shRNA-  
83 expressing lentivirus and subsequently infected with *in1374* for 2 days. DAXX, ATRX, HIRA or UBN1 (green), and HSV-1  
84 genomes (red) were detected. Scale bars = 5  $\mu$ m.

85 (C) Quantification of the immuno-FISH experiments performed in (B). Data represent means from three independent  
86 experiments  $\pm$  SD. The Student's *t*-test was applied to assess the significance of the results. \* =  $p < 0.05$  (See Table S7 for data).

87

88 Figure 7. Depletion of PML significantly impacts the association of H3.3 with latent/quiescent HSV-1 genomes.

89 (A) Data from immuno-FISH experiments performed in e-H3.3-expressing BJ cells transduced with a control (shCTRL) or  
90 PML (shPML) shRNA-expressing lentivirus and subsequently infected with *in1374* for 2 days. E-H3.3 (green), HSV-1 genomes  
91 (red), and PML (blue) were detected. Scale bars = 5  $\mu$ m.

92 (B) Quantification of the immuno-FISH experiments performed in (A). Data represent means from three independent  
93 experiments  $\pm$  SD. The Student's *t*-test was applied to assess the significance of the results. \*\* =  $p < 0.01$ .

94 (C) ChIP-qPCR for the detection of e-H3.3 associated with HSV-1 genomes and performed in e-H3.3-expressing BJ cells  
95 infected by *in1374* for 24 h and previously transduced with a lentivirus expressing a control shRNA (shCTRL, blue) or a PML  
96 shRNA (shPML, red). Anti-HA antibody was used for the ChIP experiments. The analyzed viral loci were described previously.  
97 Data represent means from three independent experiments  $\pm$  SD. The Student's *t*-test was applied to assess the significance  
98 of the results. \* =  $p < 0.05$  (See Table S6 for data).

99 (D) WB for the detection of e-H3.3 in control e-H3.3-expressing BJ cells (CTRL) or e-H3.3-expressing BJ cells transduced with  
00 a lentivirus expressing a control shRNA (shCTRL) or a PML shRNA (shPML). Actin was detected as a loading control.

01 (E) WB for the detection of e-H3.3 in control and e-H3.3-expressing MEF *pml*<sup>+/+</sup> or *pml*<sup>-/-</sup> cells. Actin and total histone H3  
02 were detected as loading controls.

03 (F) ChIP-qPCR for the detection of e-H3.3 associated with HSV-1 genomes and performed in e-H3.3-expressing *pml*<sup>+/+</sup> (blue)  
04 or *pml*<sup>-/-</sup> (red) MEF cells infected by *in1374* for 24 h. Anti-HA antibody was used for the ChIP experiments. Analyzed viral loci

05 were described previously. Data represent means from three independent experiments  $\pm$  SD. The Student's *t*-test was applied  
06 to assess the significance of the results. \* =  $p < 0.05$ , \*\* =  $p < 0.01$ . See Table S8 for data.

07  
08

09 Supplementary Figures

10 Figure S1. Latent/quiescent HSV-1 genomes co-localize with PML and PML-NB-associated proteins in vDCP-NBs.  
11 Data from immuno-FISH experiments performed in human primary fibroblasts (BJ cells) infected for 2 days with the  
12 replication-defective HSV-1 virus *in1374*. PML (i), Sp100 (ii), SUMO-1 (iii), SUMO 2/3 (iv), ATRX (v), DAXX (vi) (green), and  
13 HSV-1 genomes (red) were detected. Scale bars = 5  $\mu$ m.

14

15 Figure S2. Expression of tagged versions of DAXX (Myc), HIRA and UBN1 (HA) in BJ cells.  
16 Normal BJ cells were transduced with lentiviruses expressing Myc-DAXX, HIRA-HA, or HA-UBN1, and stable cell lines  
17 expressing the tagged proteins were selected by puromycin selection. Expression of the tagged proteins was detected by  
18 immunofluorescence (A) and Western blotting (B). For WB, actin was used as a loading control. Scale bars = 5  $\mu$ m.

19

20 Figure S3. Expression of the tagged H3.3 (e-H3.3) and H3.1 (e-H3.1) in BJ cells.  
21 (A) Detection of the protein expression by WB using the anti-HA antibody. Endogenous histone H3 was detected as a control.  
22 Actin was detected as a loading control.  
23 (B) Detection of e-H3.1 (i) and e-H3.3 (ii) by immunofluorescence.  
24 (C) Co-detection of e-H3.1 (i) and e-H3.3 (ii) (green) with PML (red). E-H3.3, unlike e-H3.1, co-localizes with PML-NBs. Scale  
25 bars = 5  $\mu$ m.  
26 (D) Quantification of the immunofluorescence experiments performed in (C). Data from two independent experiments.

27

28 Figure S4. The native histone variant H3.3, but not the canonical H3.1/2, associates with latent/quiescent HSV-1 genomes.  
29 (A) ChIP-qPCR performed in *in1374*-infected normal BJ cells using control IgG (blue), anti-H3.1/2 (red), or anti-H3.3 (green)  
30 antibodies.  
31 (B) ChIP-qPCR performed in *in1374*-infected BJ e-H3.3 cells using control IgG (blue), anti-H3.1/2 (red), anti-H3.3 (green), or  
32 anti-HA (purple) antibodies.

33

34 Figure S5. Validation of the shRNAs against DAXX, ATRX, HIRA, and UBN1.  
35 (A) BJ cells were transduced with shRNA-expressing lentiviruses before analysis 48 h post-transduction. RT-qPCR to detect  
36 DAXX, ATRX, HIRA, and UBN1 mRNA was performed, and the results were compared to a control shRNA (shCTRL). Data

37 represent means from three independent experiments  $\pm$  SD. The Student's *t*-test was applied to assess the significance of the  
38 results. \* =  $p < 0.05$ , \*\* =  $p < 0.01$ .

39 (B) WB for detection of decreases in DAXX, ATRX, HIRA, and UBN1 proteins (48 h post-transduction) in normal BJ cells or BJ  
40 cells transduced with shRNA-expressing lentiviruses. Actin was detected as a loading control. Two shRNAs were tested for  
41 each protein.

42

43 Figure S6. Effects of the depletion of DAXX, ATRX, HIRA or UBN1 on PML-NB detection. BJ cells were transduced with shRNA-  
44 expressing lentiviruses before analysis 48 h post-transduction. Immunofluorescences were performed to detect DAXX, ATRX,  
45 HIRA, and UBN1 (green) and PML (gray, red). Two shRNAs were tested for each protein. Scale bars = 5  $\mu$ m.

46

47 Figure S7. Validation of the shRNAs against DAXX, ATRX, HIRA, and UBN1 in e-H3.3-expressing BJ cells. H3.3-expressing BJ  
48 cells were transduced with shRNA-expressing lentiviruses before analysis 48 h post-transduction.

49 (A) RT-qPCR to quantify DAXX, ATRX, HIRA, and UBN1 mRNA was performed, and the results were compared to a control  
50 shRNA (shCTRL). Data represent means from two independent experiments.

51 (B) WB for detection of decreases in ATRX, HIRA, and UBN1 proteins (48 h post-transduction) in normal e-H3.3-expressing  
52 BJ cells or e-H3.3-expressing BJ cells transduced with shRNA-expressing lentiviruses. Actin was detected as a loading control.

53

54 Figure S8. Depletion of DAXX, ATRX, HIRA, or UBN1 does not affect the accumulation of e-H3.3 in PML-NBs.  
55 Immunofluorescence experiments performed in e-H3.3-expressing BJ cells transduced with a lentivirus expressing a control  
56 shRNA (shCTRL, i, iii, v, vii) or a shRNA targeting DAXX (ii), ATRX (iv), HIRA (vi), or UBN1 (viii). E-H3.3 (gray, green); DAXX,  
57 ATRX, HIRA, UBN1 (gray, red); and PML (gray, blue) were detected. For the staining, a rat anti-HA mAb was used to detect e-  
58 H3.3, a rabbit polyclonal for the detection of DAXX, ATRX (i-iv), or PML (v-viii), and a mouse mAb for the detection of HIRA,  
59 UBN1 (v-viii) or PML (i-iv). Arrowheads note an example of e-H3.3 co-localization with PML-NBs in each sample. Scale bars =  
60 5  $\mu$ m.

61

62 Figure S9. Validation of the shRNAs against PML in normal and e-H3.3-expressing BJ cells.

63 Normal (A-C) or e-H3.3-expressing (D and E) BJ cells were transduced with a lentivirus expressing a control shRNA (shCTRL)  
64 or PML shRNAs (shPML) before analysis. Two different shRNAs were validated in normal BJ cells.

65 (A) Immunofluorescence to detect the PML-NB signal.

66 (B) RT-qPCR to quantify PML mRNA. Data represent means from three independent experiments  $\pm$  SD. The Student's *t*-test  
67 was applied to assess the significance of the results. \* =  $p < 0.05$ , \*\* =  $p < 0.01$ .

68 (C) WB to detect PML protein.



69 (D) RT-qPCR to quantify PML mRNA. Data represent means from two independent experiments.

70 (E) WB to detect PML protein.

71

72 Figure S10. The decrease in the H3.3 association with latent/quiescent HSV-1 genomes in BJ cells depleted for PML-NBs is not  
73 compensated by H3.1. ChIP-qPCR for the detection of e-H3.1 associated with HSV-1 in e-H3.1-expressing BJ cells infected  
74 with *in1374* for 24 h and previously transduced with a lentivirus expressing a shRNA control (shCTRL, blue) or a PML shRNA  
75 (shPML, red). Anti-HA antibody was used for the ChIP experiments. The analyzed viral loci were described previously. The  
76 data for ICP27pro and ICP0pro loci are not shown because the CTs in the PML shRNA samples were above the quantification  
77 range. Data represent means from two independent experiments  $\pm$  SD.

78

79 Figure S11. The specific depletion of H3.3 does not affect the PML-NBs.

80 (A) WB to visualize the depletion of H3.3 in e-H3.3-expressing BJ cells. A combination of two siRNAs targeting H3.3  
81 transcripts from both H3.3-encoding genes (H3F3A and H3F3B) were used for the depletion of H3.3. Actin was detected as a  
82 loading control.

83 (B) Immunofluorescence experiment performed in e-H3.3-expressing BJ cells transfected with control (siCTRL) or H3.3  
84 (siH3F3A+3B) siRNAs. E-H3.3 (green), and PML (red) were detected. Nuclei were detected with DAPI (gray). Scale bars = 5  
85  $\mu$ m.

86 (C) Quantifications of co-localizations of HSV-1 genomes with PML issued from immuno-FISH experiments performed in  
87 *in1374*-infected BJ cells (2 dpi) previously transfected with control (siCTRL) or H3.3 (siH3F3A+3B) siRNAs. Data represent  
88 means from three independent experiments  $\pm$  SD. The data suggest that vDCP-NBs are independent of H3.3 chromatinization  
89 of the latent/quiescent HSV-1 genomes for their formation.

90

## 91 References

92

- 93 1. Whitley RJ, Roizman B. Herpes simplex virus infections. *Lancet*. 2001;357: 1513–1518.
- 94 2. Efstathiou S, Preston CM. Towards an understanding of the molecular basis of herpes simplex virus latency. *Virus Res*.  
95 2005;111: 108–119.
- 96 3. St Leger AJ, Peters B, Sidney J, Sette A, Hendricks RL. Defining the herpes simplex virus-specific CD8+ T cell repertoire  
97 in C57BL/6 mice. *J Immunol*. 2011;186: 3927–3933.
- 98 4. van Velzen M, Jing L, Osterhaus ADME, Sette A, Koelle DM, Verjans GMGM. Local CD4 and CD8 T-cell reactivity to  
99 HSV-1 antigens documents broad viral protein expression and immune competence in latently infected human  
00 trigeminal ganglia. *PLoS Pathog*. 2013;9.
- 01 5. Douglas MW, Diefenbach RJ, Homa FL, Miranda-Saksena M, Rixon FJ, Vittone V, et al. Herpes simplex virus type 1  
02 capsid protein VP26 interacts with dynein light chains RP3 and Tctex1 and plays a role in retrograde cellular  
03 transport. *The Journal of biological chemistry*. American Society for Biochemistry and Molecular Biology; 2004;279:  
04 28522–28530.

- 05 6. Sodeik B, Ebersold MW, Helenius A. Microtubule-mediated transport of incoming herpes simplex virus 1 capsids to  
06 the nucleus. *J Cell Biol.* 1997;136: 1007–1021.
- 07 7. Döhner K, Radtke K, Schmidt S, Sodeik B. Eclipse phase of herpes simplex virus type 1 infection: Efficient dynein-  
08 mediated capsid transport without the small capsid protein VP26. *J Virol.* 2006;80: 8211–8224.
- 09 8. Koyuncu OO, Hogue IB, Enquist LW. Virus infections in the nervous system. *Cell Host Microbe.* Elsevier; 2013;13: 379–  
10 393.
- 11 9. Kramer T, Enquist LW. Directional spread of alphaherpesviruses in the nervous system. *Viruses.* 2013;5: 678–707.
- 12 10. Taylor MP, Enquist LW. Axonal spread of neuroinvasive viral infections. *Trends Microbiol.* 2015;23: 288.
- 13 11. Sears AE, Hukkanen V, Labow MA, Levine AJ, Roizman B. Expression of the herpes simplex virus 1 alpha transinducing  
14 factor (VP16) does not induce reactivation of latent virus or prevent the establishment of latency in mice. *J Virol.*  
15 1991;65: 2929–2935.
- 16 12. Luxton GWG, Haverlock S, Collier KE, Antinone SE, Pincetic A, Smith GA. Targeting of herpesvirus capsid transport in  
17 axons is coupled to association with specific sets of tegument proteins. *Proc Natl Acad Sci USA.* 2005;102: 5832–5837.
- 18 13. Aggarwal A, Miranda-Saksena M, Boadle RA, Kelly BJ, Diefenbach RJ, Alam W, et al. Ultrastructural visualization of  
19 individual tegument protein dissociation during entry of herpes simplex virus 1 into human and rat dorsal root  
20 ganglion neurons. *J Virol.* 2012;86: 6123–6137.
- 21 14. Sawtell NM, Thompson RL. De Novo Herpes Simplex Virus VP16 Expression Gates a Dynamic Programmatic Transition  
22 and Sets the Latent/Lytic Balance during Acute Infection in Trigeminal Ganglia. *PLoS Pathog.* Public Library of Science;  
23 2016;12: e1005877.
- 24 15. Catez F, Picard C, Held K, Gross S, Rousseau A, Theil D, et al. HSV-1 Genome Subnuclear Positioning and Associations  
25 with Host-Cell PML-NBs and Centromeres Regulate LAT Locus Transcription during Latency in Neurons. *PLoS Pathog.*  
26 2012;8: e1002852.
- 27 16. Maroui M-A, Callé A, Cohen C, Streichenberger N, Texier P, Takissian J, et al. Latency Entry of Herpes Simplex Virus 1  
28 Is Determined by the Interaction of Its Genome with the Nuclear Environment. *PLoS Pathog.* Public Library of Science;  
29 2016;12: e1005834.
- 30 17. Mehta A, Maggioncalda J, Bagasra O, Thikkavarapu S, Saikumari P, Valyi-Nagy T, et al. In situ DNA PCR and RNA  
31 hybridization detection of herpes simplex virus sequences in trigeminal ganglia of latently infected mice. *Virology.*  
32 1995;206: 633–640.
- 33 18. Sawtell NM. Comprehensive quantification of herpes simplex virus latency at the single-cell level. *J Virol.* 1997 ed.  
34 1997;71: 5423–5431.
- 35 19. Sawtell NM, Poon DK, Tansky CS, Thompson RL. The latent herpes simplex virus type 1 genome copy number in  
36 individual neurons is virus strain specific and correlates with reactivation. *J Virol.* 1998 ed. 1998;72: 5343–5350.
- 37 20. Chen X-P, Mata M, Kelley M, Glorioso JC, Fink DJ. The relationship of herpes simplex virus latency associated  
38 transcript expression to genome copy number: a quantitative study using laser capture microdissection. *J Neurovirol.*  
39 2002;8: 204–210.
- 40 21. Wang K, Lau TY, Morales M, Mont EK, Straus SE. Laser-capture microdissection: refining estimates of the quantity and  
41 distribution of latent herpes simplex virus 1 and varicella-zoster virus DNA in human trigeminal Ganglia at the single-  
42 cell level. *J Virol.* 2005 ed. 2005;79: 14079–14087.
- 43 22. Proenca JT, Coleman HM, Connor V, Winton DJ, Efsthathiou S. A historical analysis of herpes simplex virus promoter  
44 activation in vivo reveals distinct populations of latently infected neurones. *The Journal of general virology.* 2008;89:  
45 2965–2974.
- 46 23. Proenca JT, Coleman HM, Nicoll MP, Connor V, Preston CM, Arthur J, et al. An investigation of HSV promoter activity  
47 compatible with latency establishment reveals VP16 independent activation of HSV immediate early promoters in  
48 sensory neurones. *The Journal of general virology.* 2011;92: 2575–2585.

- 49 24. Held K, Junker A, Dornmair K, Meinel E, Sinicina I, Brandt T, et al. Expression of herpes simplex virus 1-encoded  
50 microRNAs in human trigeminal ganglia and their relation to local T-cell infiltrates. *J Virol.* 2011;85: 9680–9685.
- 51 25. Bloom DC, Giordani NV, Kwiatkowski DL. Epigenetic regulation of latent HSV-1 gene expression. *Biochimica et*  
52 *biophysica acta.* 2010 ed. 2010;1799: 246–256.
- 53 26. Kristie TM, Liang Y, Vogel JL. Control of alpha-herpesvirus IE gene expression by HCF-1 coupled chromatin  
54 modification activities. *Biochimica et biophysica acta.* 2009 ed. 2010;1799: 257–265.
- 55 27. Knipe DM, Lieberman PM, Jung JU, McBride AA, Morris KV, Ott M, et al. Snapshots: chromatin control of viral  
56 infection. *Virology.* 2013;435: 141–156.
- 57 28. Deshmane SL, Fraser NW. During latency, herpes simplex virus type 1 DNA is associated with nucleosomes in a  
58 chromatin structure. *J Virol.* 1989;63: 943–947.
- 59 29. Cliffe AR, Garber DA, Knipe DM. Transcription of the herpes simplex virus latency-associated transcript promotes the  
60 formation of facultative heterochromatin on lytic promoters. *J Virol.* 2009 ed. American Society for Microbiology;  
61 2009;83: 8182–8190.
- 62 30. Kwiatkowski DL, Thompson HW, Bloom DC. The polycomb group protein Bmi1 binds to the herpes simplex virus 1  
63 latent genome and maintains repressive histone marks during latency. *J Virol.* 2009 ed. American Society for  
64 Microbiology; 2009;83: 8173–8181.
- 65 31. Tagami H, Ray-Gallet D, Almouzni G, Nakatani Y. Histone H3.1 and H3.3 complexes mediate nucleosome assembly  
66 pathways dependent or independent of DNA synthesis. *Cell.* 2004;116: 51–61.
- 67 32. Szenker E, Ray-Gallet D, Almouzni G. The double face of the histone variant H3.3. *Cell Res.* 2011;21: 421–434.
- 68 33. Banumathy G, Somaiah N, Zhang R, Tang Y, Hoffmann J, Andrade M, et al. Human UBN1 is an ortholog of yeast Hpc2p  
69 and has an essential role in the HIRA/ASF1a chromatin-remodeling pathway in senescent cells. *Molecular and cellular*  
70 *biology.* 2009;29: 758–770.
- 71 34. Rai TS, Puri A, McBryan T, Hoffman J, Tang Y, Pchelintsev NA, et al. Human CABIN1 is a functional member of the  
72 human HIRA/UBN1/ASF1a histone H3.3 chaperone complex. *Molecular and cellular biology.* 2011;31: 4107–4118.
- 73 35. Delbarre E, Ivanauskienė K, Küntziger T, Collas P. DAXX-dependent supply of soluble (H3.3-H4) dimers to PML bodies  
74 pending deposition into chromatin. *Genome Res.* 2013;23: 440–451.
- 75 36. Corpet A, Olbrich T, Gwerder M, Fink D, Stucki M. Dynamics of histone H3.3 deposition in proliferating and senescent  
76 cells reveals a DAXX-dependent targeting to PML-NBs important for pericentromeric heterochromatin organization.  
77 *Cell cycle (Georgetown, Tex.)* 2013;13: 249–267.
- 78 37. Delbarre E, Ivanauskienė K, Spirkoski J, Shah A, Vekterud K, Moskaug JØ, et al. PML protein organizes  
79 heterochromatin domains where it regulates histone H3.3 deposition by ATRX/DAXX. *Genome Res. Cold Spring*  
80 *Harbor Lab;* 2017;; gr.215830.116.
- 81 38. Everett RD, Murray J, Orr A, Preston CM. Herpes simplex virus type 1 genomes are associated with ND10 nuclear  
82 substructures in quiescently infected human fibroblasts. *J Virol.* 2007 ed. American Society for Microbiology; 2007;81:  
83 10991–11004.
- 84 39. Jamieson DR, Robinson LH, Daksis JJ, Nicholl MJ, Preston CM. Quiescent viral genomes in human fibroblasts after  
85 infection with herpes simplex virus type 1 Vmw65 mutants. *The Journal of general virology.* 1995 ed. 1995;76 ( Pt 6):  
86 1417–1431.
- 87 40. Preston CM, Nicholl MJ. Repression of gene expression upon infection of cells with herpes simplex virus type 1  
88 mutants impaired for immediate-early protein synthesis. *J Virol.* 1997;71: 7807–13.
- 89 41. Samaniego LA, Neiderhiser L, DeLuca NA. Persistence and expression of the herpes simplex virus genome in the  
90 absence of immediate-early proteins. *J Virol.* 1998;72: 3307–20.
- 91 42. Ferenczy MW, DeLuca NA. Epigenetic modulation of gene expression from quiescent herpes simplex virus genomes. *J*  
92 *Virol.* 2009 ed. American Society for Microbiology; 2009;83: 8514–8524.

- 93 43. Drané P, Ouararhni K, Depaux A, Shuaib M, Hamiche A. The death-associated protein DAXX is a novel histone  
94 chaperone involved in the replication-independent deposition of H3.3. *Genes & development*. 2010;24: 1253–1265.
- 95 44. Jackson SA, DeLuca NA. Relationship of herpes simplex virus genome configuration to productive and persistent  
96 infections. *Proc Natl Acad Sci USA*. 2003;100: 7871–7876.
- 97 45. Ray-Gallet D, Quivy J-P, Scamps C, Martini EM-D, Lipinski M, Almouzni G. HIRA is critical for a nucleosome assembly  
98 pathway independent of DNA synthesis. *Molecular cell*. 2002;9: 1091–1100.
- 99 46. Ray-Gallet D, Woolfe A, Vassias I, Pellentz C, Lacoste N, Puri A, et al. Dynamics of histone h3 deposition in vivo reveal  
00 a nucleosome gap-filling mechanism for h3.3 to maintain chromatin integrity. *Molecular cell*. 2011;44: 928–941.
- 01 47. LOMONTE P. The interaction between herpes simplex virus 1 genome and promyelocytic leukemia nuclear bodies  
02 (PML-NBs) as a hallmark of the entry in latency. *Microb Cell*. 2016;3: 569–572.
- 03 48. Albright ER, Kalejta RF. Canonical and variant forms of histone H3 are deposited onto the human cytomegalovirus  
04 genome during lytic and latent infections. *J Virol*. 2016.
- 05 49. Placek BJ, Huang J, Kent JR, Dorsey J, Rice L, Fraser NW, et al. The histone variant H3.3 regulates gene expression  
06 during lytic infection with herpes simplex virus type 1. *J Virol*. 2008 ed. 2009;83: 1416–1421.
- 07 50. Oh J, Ruskoski N, Fraser NW. Chromatin assembly on herpes simplex virus 1 DNA early during a lytic infection is Asf1a  
08 dependent. *J Virol*. 2012;86: 12313–12321.
- 09 51. Rai TS, Glass M, Cole JJ, Rather MI, Marsden M, Neilson M, et al. Histone chaperone HIRA deposits histone H3.3 onto  
10 foreign viral DNA and contributes to anti-viral intrinsic immunity. *Nucleic acids research*. 2017, gkx827, advance  
11 articles.
- 12 52. Orzalli MH, Conwell SE, Berrios C, DeCaprio JA, Knipe DM. Nuclear interferon-inducible protein 16 promotes silencing  
13 of herpesviral and transfected DNA. *Proc Natl Acad Sci USA*. 2013;110: 501.
- 14 53. Unterholzner L, Keating SE, Baran M, Horan KA, Jensen SB, Sharma S, et al. IFI16 is an innate immune sensor for  
15 intracellular DNA. *Nat Immunol*. 2010;11: 997–1004.
- 16 54. Kerur N, Veettil MV, Sharma-Walia N, Bottero V, Sadagopan S, Otageri P, et al. IFI16 acts as a nuclear pathogen  
17 sensor to induce the inflammasome in response to Kaposi Sarcoma-associated herpesvirus infection. *Cell Host  
18 Microbe*. 2011;9: 363–375.
- 19 55. Gariano GR, Dell'Oste V, Bronzini M, Gatti D, Luganini A, De Andrea M, et al. The intracellular DNA sensor IFI16 gene  
20 acts as restriction factor for human cytomegalovirus replication. *PLoS Pathog*. 2012;8: e1002498.
- 21 56. Orzalli MH, Deluca NA, Knipe DM. Nuclear IFI16 induction of IRF-3 signaling during herpesviral infection and  
22 degradation of IFI16 by the viral ICP0 protein. *Proc Natl Acad Sci USA*. *National Acad Sciences*; 2012;109: E3008–17.
- 23 57. Johnson KE, Chikoti L, Chandran B. Herpes simplex virus 1 infection induces activation and subsequent inhibition of  
24 the IFI16 and NLRP3 inflammasomes. *J Virol*. 2013;87: 5005–5018.
- 25 58. Ansari MA, Singh VV, Dutta S, Veettil MV, Dutta D, Chikoti L, et al. Constitutive interferon-inducible protein 16-  
26 inflammasome activation during Epstein-Barr virus latency I, II, and III in B and epithelial cells. *J Virol*. 2013;87: 8606–  
27 8623.
- 28 59. Dutta D, Dutta S, Veettil MV, Roy A, Ansari MA, Iqbal J, et al. BRCA1 Regulates IFI16 Mediated Nuclear Innate Sensing  
29 of Herpes Viral DNA and Subsequent Induction of the Innate Inflammasome and Interferon- $\beta$  Responses. *Feng P,*  
30 *editor*. *PLoS Pathog*. 2015;11: e1005030.
- 31 60. Diner BA, Li T, Greco TM, Crow MS, Fuesler JA, Wang J, et al. The functional interactome of PYHIN immune regulators  
32 reveals IFIX is a sensor of viral DNA. *Mol Syst Biol*. *European Molecular Biology Organization*; 2015;11: 787–787.
- 33 61. Ivanauskienė K, Delbarre E, McGhie J, Küntziger T, Wong LH, Collas P. The PML-associated protein DEK regulates the  
34 balance of H3.3 loading on chromatin and is important for telomere integrity. *Genome Res*. *Cold Spring Harbor Lab*;  
35 2014;24: 1584–1594.

- 36 62. Labetoulle M, Maillet S, Efstathiou S, Dezelee S, Frau E, Lafay F. HSV1 latency sites after inoculation in the lip:  
37 assessment of their localization and connections to the eye. *Invest Ophthalmol Vis Sci.* 2003;44: 217–225.
- 38 63. Preston CM. Abnormal properties of an immediate early polypeptide in cells infected with the herpes simplex virus  
39 type 1 mutant tsK. *J Virol.* 1979;32: 357–369.
- 40 64. Ace CI, McKee TA, Ryan JM, Cameron JM, Preston CM. Construction and characterization of a herpes simplex virus  
41 type 1 mutant unable to transinduce immediate-early gene expression. *J Virol.* 1989;63: 2260–2269.
- 42 65. Preston CM, Rinaldi A, Nicholl MJ. Herpes simplex virus type 1 immediate early gene expression is stimulated by  
43 inhibition of protein synthesis. *The Journal of general virology.* 1998;79 (Pt 1): 117–124.
- 44 66. Preston CM, Nicholl MJ. Human Cytomegalovirus Tegument Protein pp71 Directs Long-Term Gene Expression from  
45 Quiescent Herpes Simplex Virus Genomes. *J Virol.* 2005;79: 525–535.
- 46 67. McFarlane M, Dakis JI, Preston CM. Hexamethylene bisacetamide stimulates herpes simplex virus immediate early  
47 gene expression in the absence of trans-induction by Vmw65. *The Journal of general virology.* 1992;73 (Pt 2): 285–  
48 292.
- 49 68. Wang ZG, Ruggero D, Ronchetti S, Zhong S, Gaboli M, Rivi R, et al. PML is essential for multiple apoptotic pathways.  
50 *Nat Genet.* 1998;20: 266–272.
- 51 69. Catez F, Rousseau A, Labetoulle M, LOMONTE P. Detection of the genome and transcripts of a persistent DNA virus in  
52 neuronal tissues by fluorescent in situ hybridization combined with immunostaining. *J Vis Exp.* 2014;: e51091.
- 53 70. Sawtell NM, Thompson RL. Comparison of herpes simplex virus reactivation in ganglia in vivo and in explants  
54 demonstrates quantitative and qualitative differences. *J Virol.* 2004 ed. 2004;78: 7784–7794.
- 55 71. Cunningham C, Davison AJ. A cosmid-based system for constructing mutants of herpes simplex virus type 1. *Virology.*  
56 1993;197: 116–124.
- 57 72. Pear W. Transient transfection methods for preparation of high-titer retroviral supernatants. *Curr Protoc Mol Biol.*  
58 Hoboken, NJ, USA: John Wiley & Sons, Inc; 2001;Chapter 9: Unit9.11.
- 59 73. Naviaux RK, Costanzi E, Haas M, Verma IM. The pCL vector system: rapid production of helper-free, high-titer,  
60 recombinant retroviruses. *J Virol.* 1996;70: 5701–5705.
- 61 74. Sambrook J, Russell DW. Calcium-phosphate-mediated Transfection of Eukaryotic Cells with Plasmid DNAs. Sambrook  
62 J, Russell D, editors. *CSH Protoc.* 2006;2006: pdb.prot3871.
- 63 75. Cantrell SR, Bresnahan WA. Human cytomegalovirus (HCMV) UL82 gene product (pp71) relieves hDaxx-mediated  
64 repression of HCMV replication. *J Virol.* 2006;80: 6188–6191.
- 65 76. Sampath P, Deluca NA. Binding of ICP4, TATA-binding protein, and RNA polymerase II to herpes simplex virus type 1  
66 immediate-early, early, and late promoters in virus-infected cells. *J Virol. American Society for Microbiology;* 2008;82:  
67 2339–2349.
- 68 77. Wang Q-Y, Zhou C, Johnson KE, Colgrove RC, Coen DM, Knipe DM. Herpesviral latency-associated transcript gene  
69 promotes assembly of heterochromatin on viral lytic-gene promoters in latent infection. *Proc Natl Acad Sci USA.*  
70 2005;102: 16055–16059.
- 71 78. Cliffe AR, Coen DM, Knipe DM. Kinetics of facultative heterochromatin and polycomb group protein association with  
72 the herpes simplex viral genome during establishment of latent infection. *MBio. American Society for Microbiology;*  
73 2013;4: e00590–12.
- 74 79. Kubat NJ, Tran RK, McAnany P, Bloom DC. Specific histone tail modification and not DNA methylation is a  
75 determinant of herpes simplex virus type 1 latent gene expression. *J Virol.* 2004 ed. 2004;78: 1139–1149.
- 76 80. Kubat NJ, Amelio AL, Giordani NV, Bloom DC. The herpes simplex virus type 1 latency-associated transcript (LAT)  
77 enhancer/rcr is hyperacetylated during latency independently of LAT transcription. *J Virol.* 2004;78: 12508–12518.
- 78 81. Zhang R, Liu ST, Chen W, Bonner M, Pehrson J, Yen TJ, et al. HP1 Proteins Are Essential for a Dynamic Nuclear

79 Response That Rescues the Function of Perturbed Heterochromatin in Primary Human Cells. *Molecular and cellular*  
80 *biology*. 2007;27: 949–962.

81



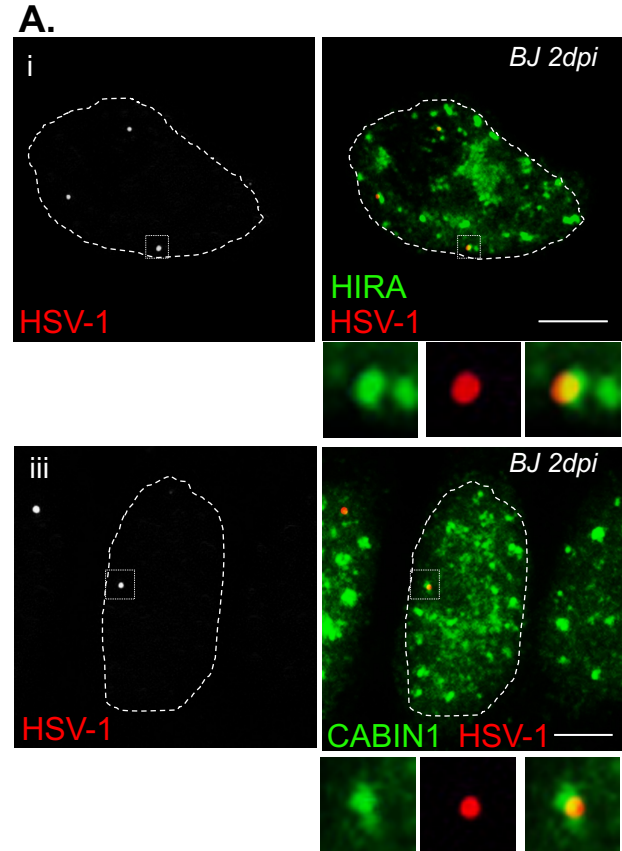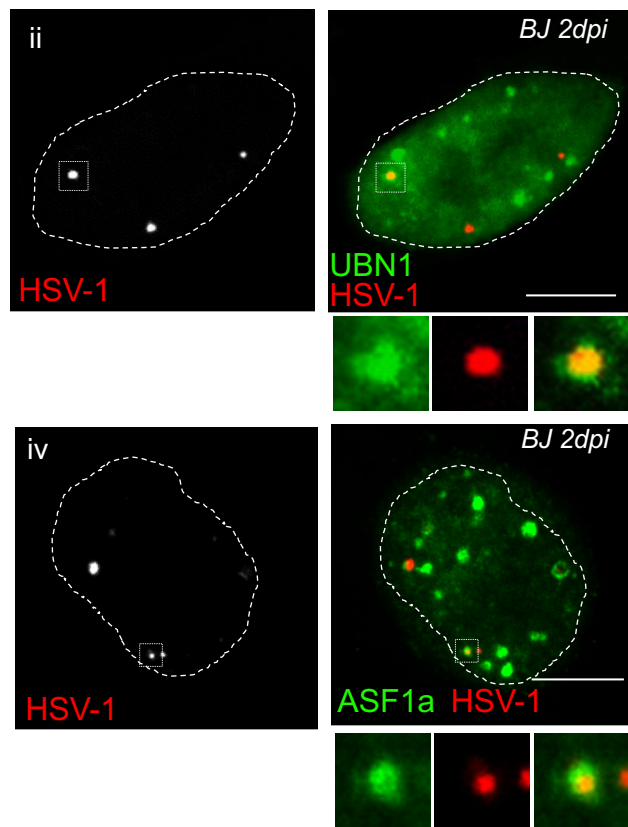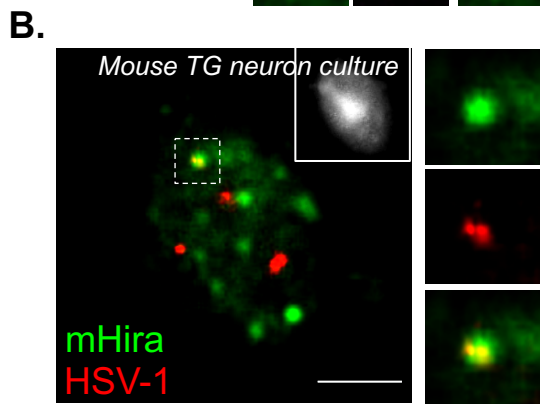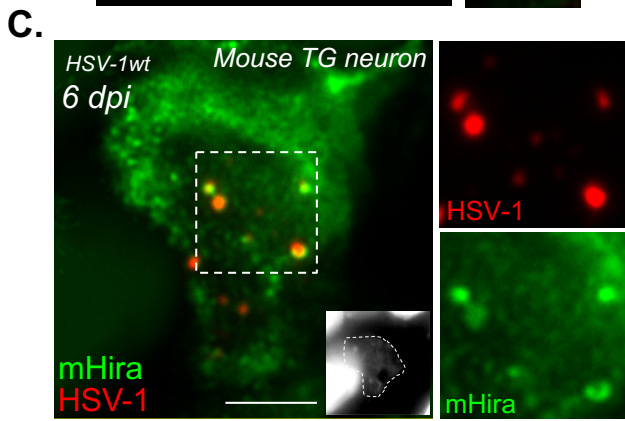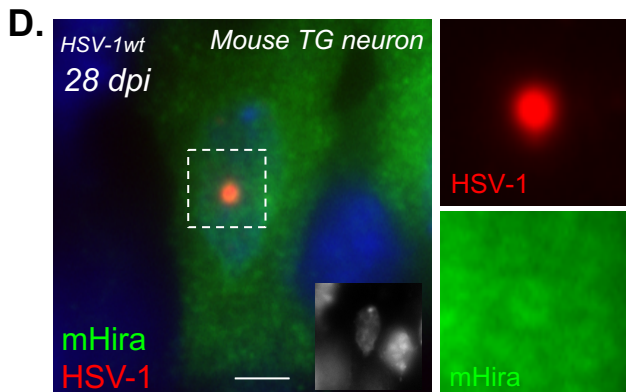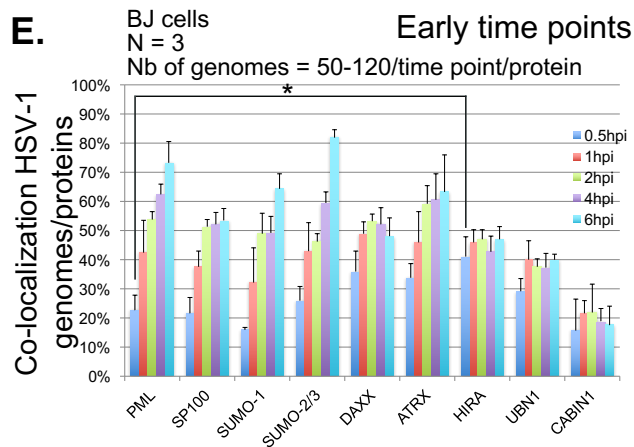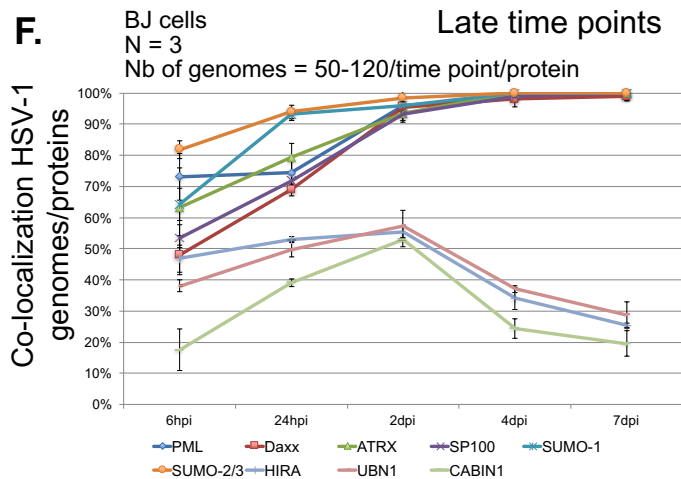

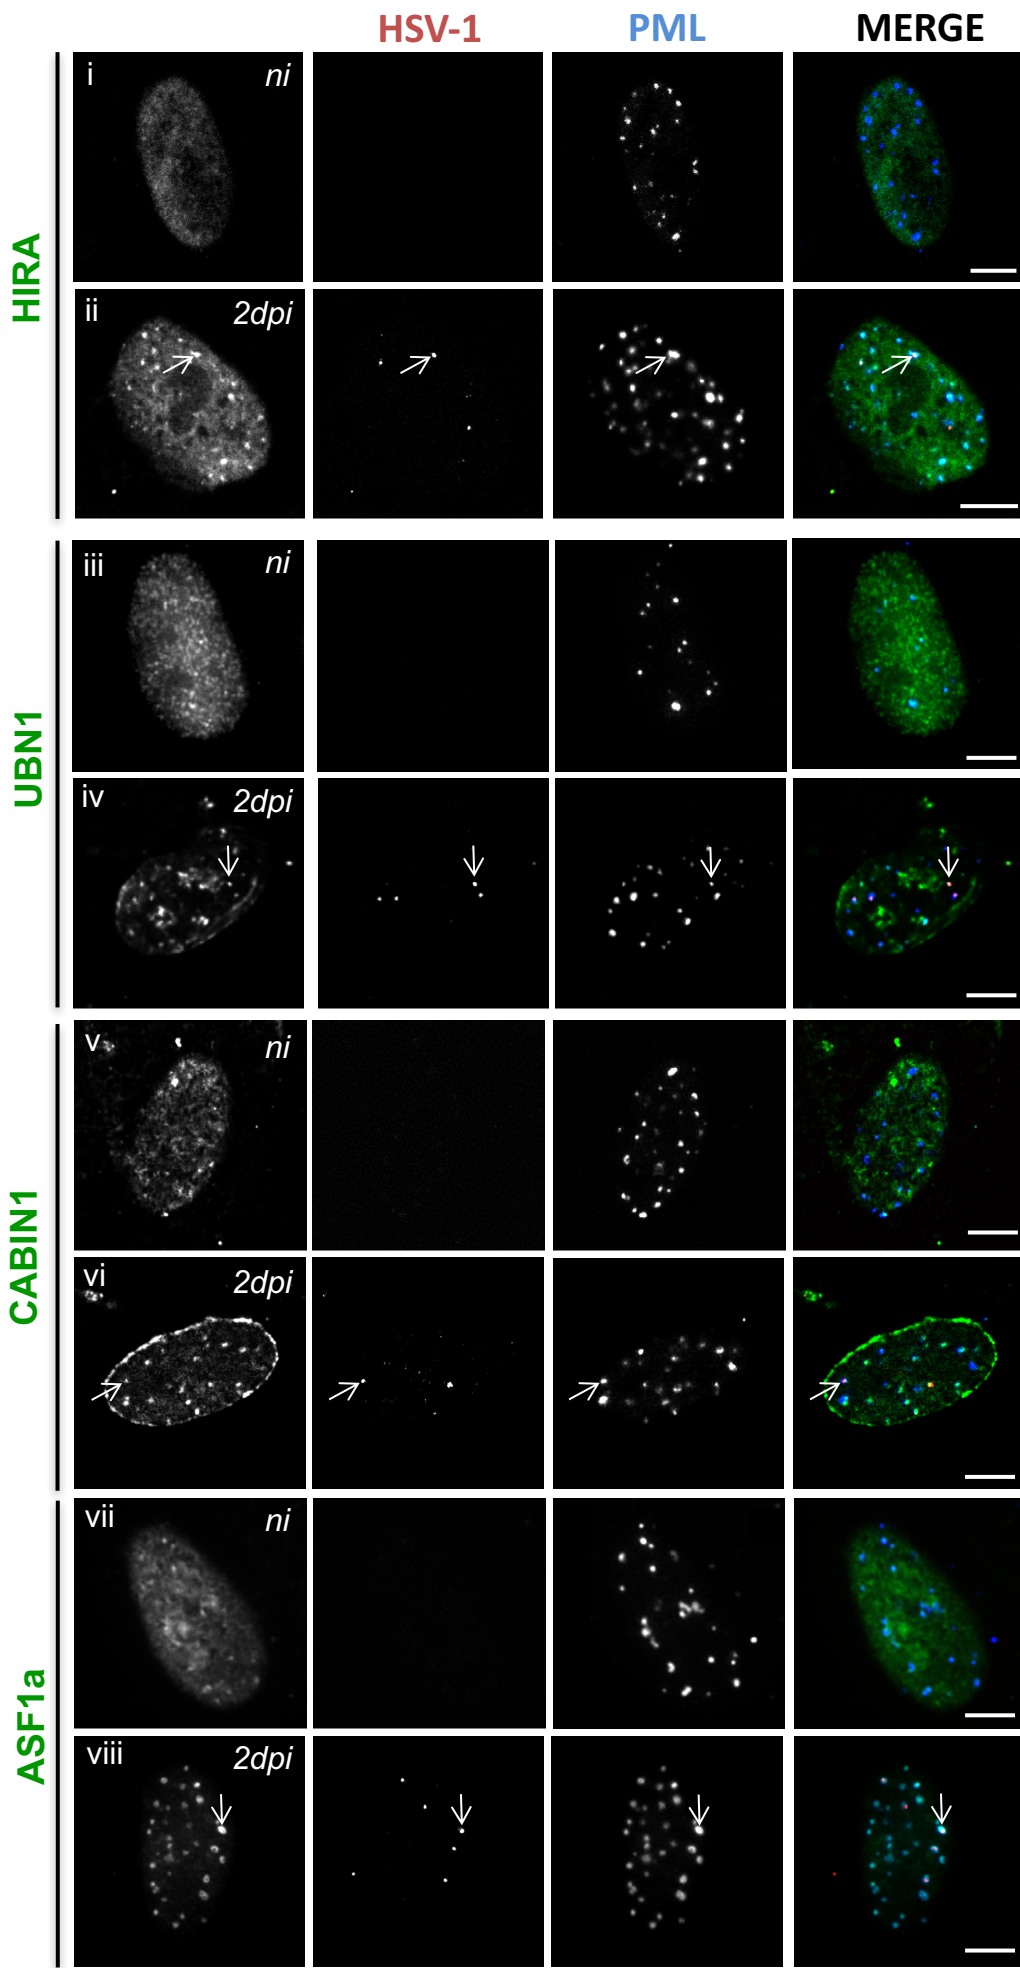

Cohen et al. Figure 2





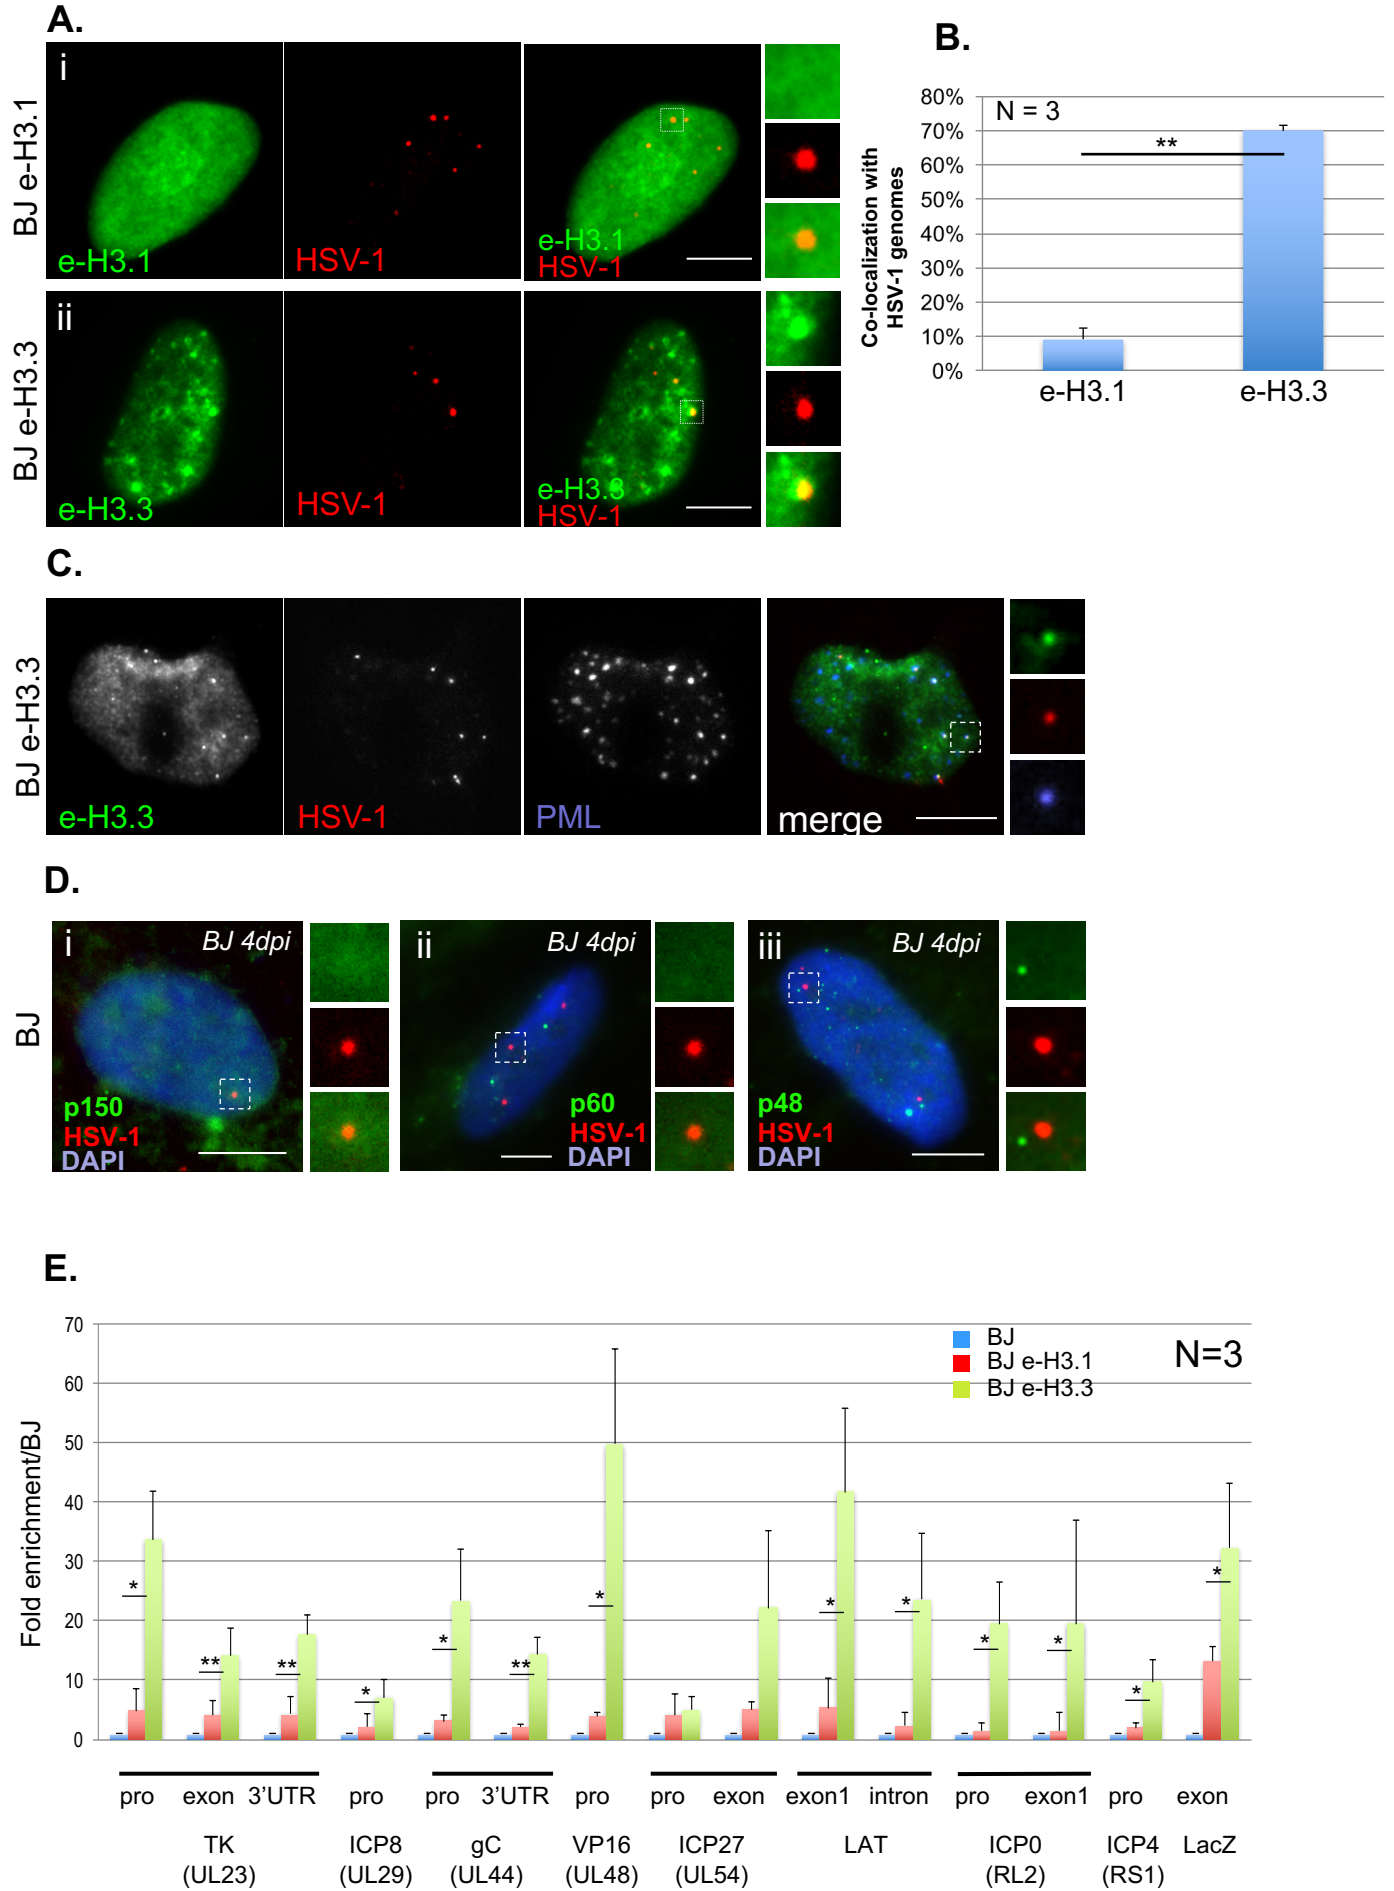

Cohen et al. Figure 4

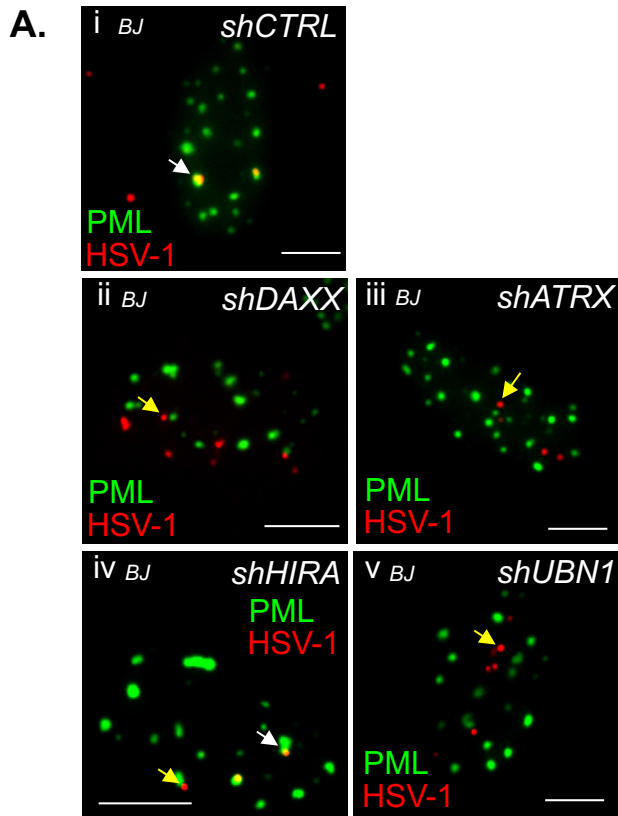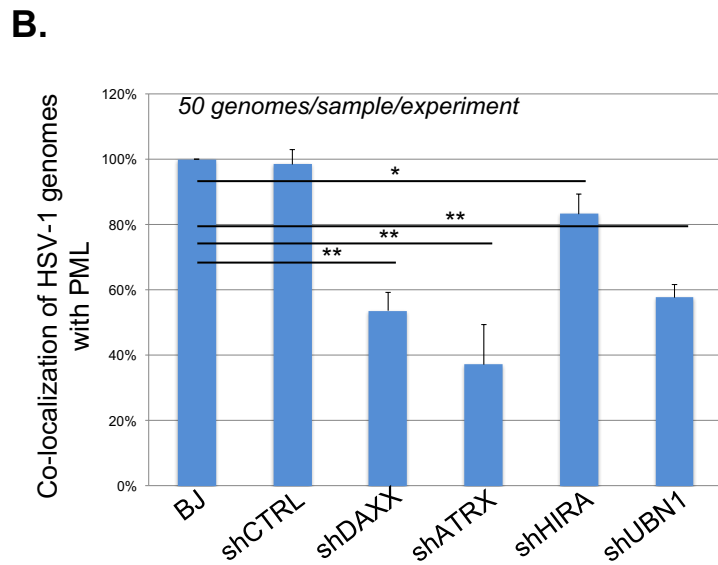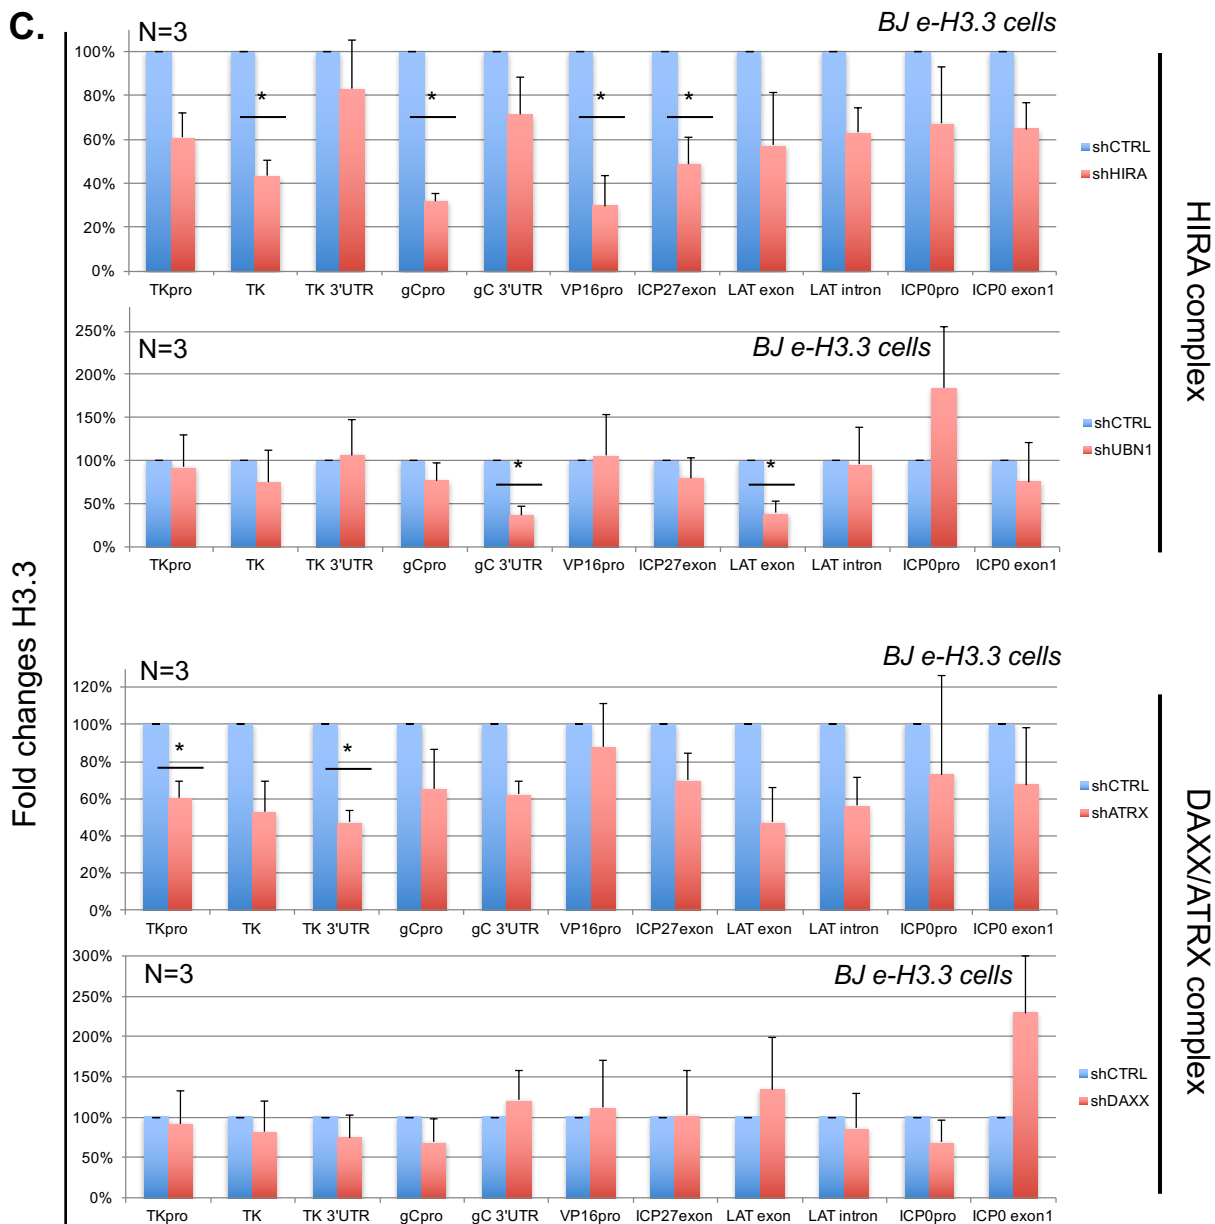

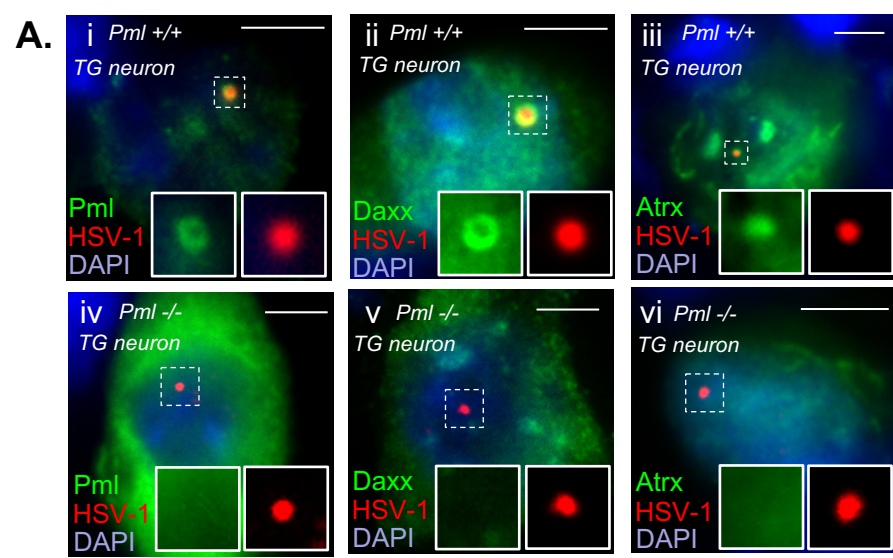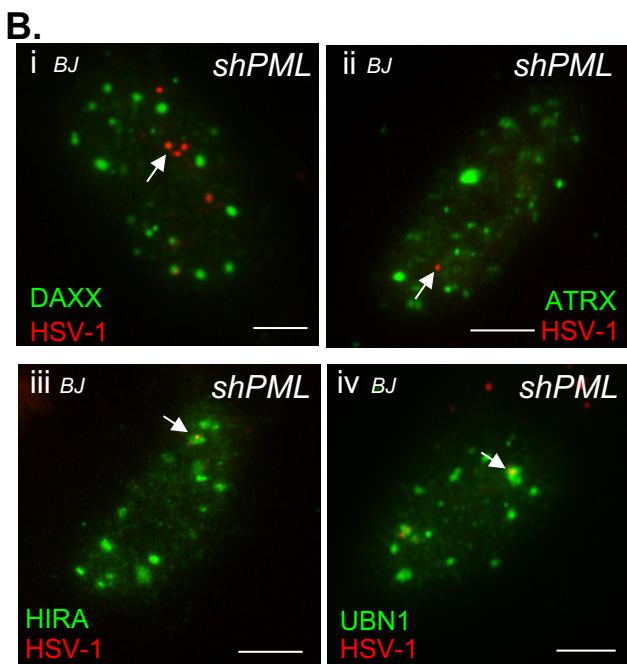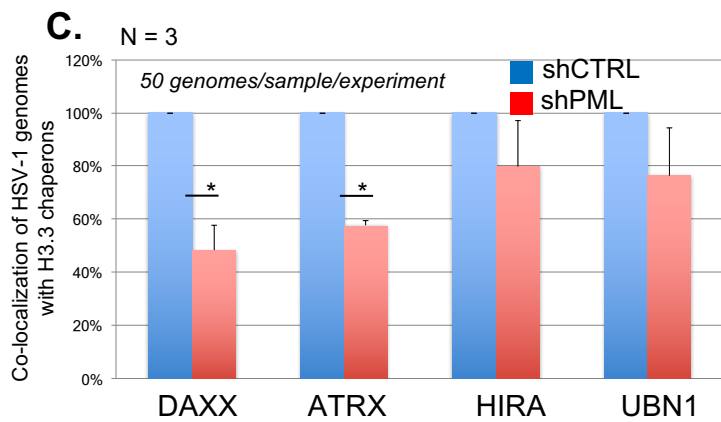

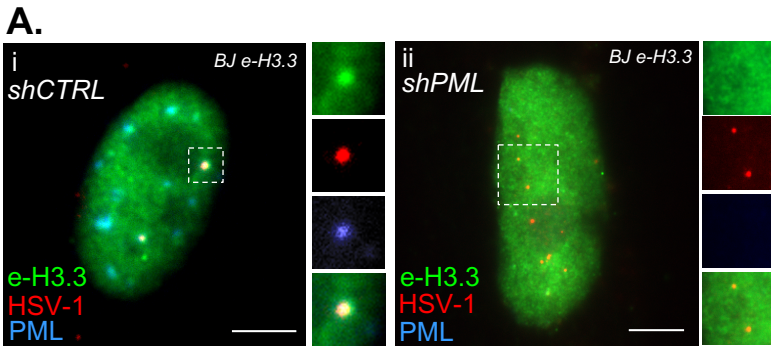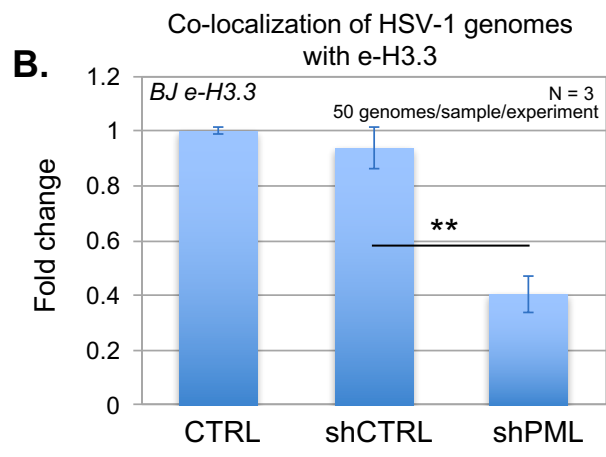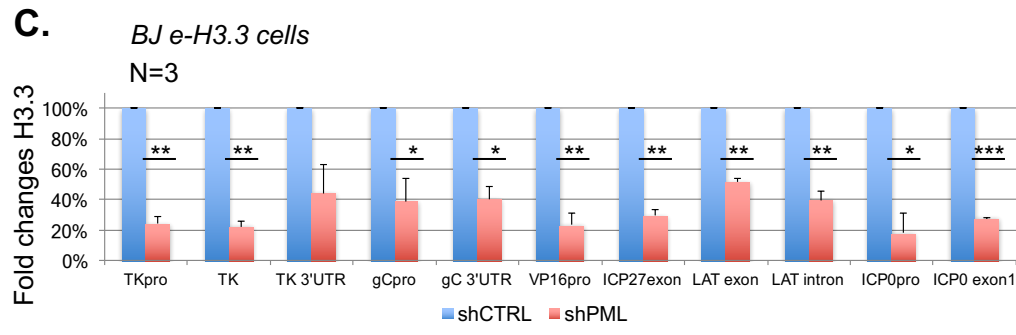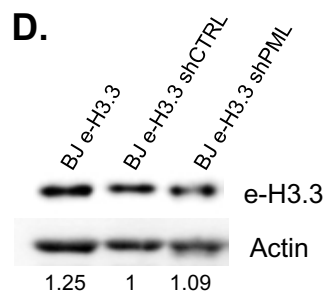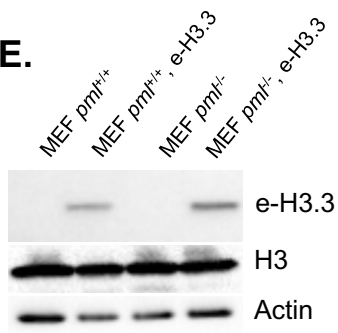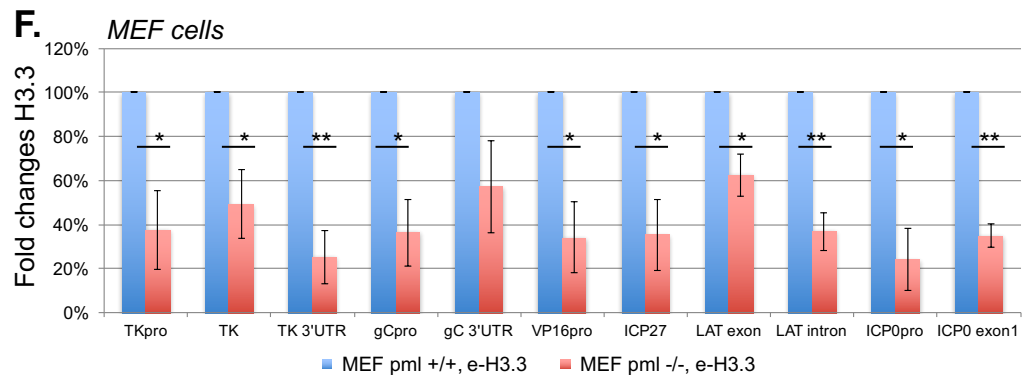

Source: https://www.biorxiv.org/content/10.1101/217026v1.full.pdf
